# Supplementary material for: Canadian Adults with Moderate Intakes of Total Sugars have Greater Intakes of Fibre and Key Micronutrients: Results from the Canadian Community Health Survey 2015 Public Use Microdata File
Source: MDPI journal article supplement (doi:10.3390/nu12041124), 2020-04-17
Supplement: s1 [file s1]

**Supplemental Table S1.** Food Categories by BNS codes.

| <b>Food Categories</b>                                                                        | <b>BNS Codes</b> | <b>Descriptions</b>                                                                                              |
|-----------------------------------------------------------------------------------------------|------------------|------------------------------------------------------------------------------------------------------------------|
| <b>PASTA, RICE, CEREAL GRAINS AND FLOUR - 01</b>                                              |                  |                                                                                                                  |
| <b>1</b>                                                                                      | 01A              | pasta                                                                                                            |
| <b>1</b>                                                                                      | 01B              | rice                                                                                                             |
| <b>1</b>                                                                                      | 01C              | cereal grains and flours                                                                                         |
| <b>1</b>                                                                                      | 130A             | those in the ingredient column - we think this is an error in the database, but this is spaghetti (1 food entry) |
| <b>WHITE BREADS - 02</b>                                                                      |                  |                                                                                                                  |
| <b>2</b>                                                                                      | 02A              | white bread                                                                                                      |
| <b>WHOLEMEAL BREADS - 03</b>                                                                  |                  |                                                                                                                  |
| <b>3</b>                                                                                      | 03A              | whole wheat bread                                                                                                |
| <b>3</b>                                                                                      | 03B              | other whole grains                                                                                               |
| <b>OTHER BREADS - 04</b>                                                                      |                  |                                                                                                                  |
| <b>4</b>                                                                                      | 04A              | rolls, bagels, pita bread, croutons, dumplings, matzo, tortilla                                                  |
| <b>4</b>                                                                                      | 04B              | crackers and crispbreads                                                                                         |
| <b>4</b>                                                                                      | 04C              | muffin and english muffin                                                                                        |
| <b>4</b>                                                                                      | 04D              | pancakes and waffles                                                                                             |
| <b>4</b>                                                                                      | 04E              | croissants, piecrusts & phyllo dough                                                                             |
| <b>4</b>                                                                                      | 04F              | dry mixes (cakes, muffins, pancakes)                                                                             |
| <b>4</b>                                                                                      | 219B             | those in the ingredient column - we think this is an error in the database, but this is submarine (1 entry)      |
| <b>WHOLEGRAIN AND HIGH FIBRE BREAKFAST CEREALS - 05</b>                                       |                  |                                                                                                                  |
| <b>5</b>                                                                                      | 05A              | whole grain, oats and high fibre breakfast cereals                                                               |
| <b>OTHER BREAKFAST CEREALS - 06</b>                                                           |                  |                                                                                                                  |
| <b>6</b>                                                                                      | 06A              | breakfast cereals                                                                                                |
| <b>COOKIES, BISCUITS AND GRANOLA BARS - 07 (+SUG150B COOKIE)</b>                              |                  |                                                                                                                  |
| <b>7</b>                                                                                      | 07A              | cookies, commercial                                                                                              |
| <b>7</b>                                                                                      | 07B              | biscuits, commercial                                                                                             |
| <b>7</b>                                                                                      | 07C              | granola bar                                                                                                      |
| <b>7</b>                                                                                      | 150B             | cookie                                                                                                           |
| <b>CAKES, PIES, DANISHES AND OTHER PASTRIES - 08 (+SUG150 RECIPES EXCEPT COOKIE IN ABOVE)</b> |                  |                                                                                                                  |
| <b>8</b>                                                                                      | 08A              | pies, commercial                                                                                                 |
| <b>8</b>                                                                                      | 08B              | cakes, commercial (frozen cake)                                                                                  |
| <b>8</b>                                                                                      | 08C              | danishes, doughnuts and other pastries, commercial                                                               |
| <b>8</b>                                                                                      | 150A             | cakes, cheesecakes, shortcakes and brownies                                                                      |
| <b>8</b>                                                                                      | 150C             | danishes, turnovers & pastries                                                                                   |
| <b>8</b>                                                                                      | 150D             | donuts                                                                                                           |
| <b>8</b>                                                                                      | 150E             | muffins                                                                                                          |
| <b>8</b>                                                                                      | 150F             | pies (including pie shell)                                                                                       |
| <b>8</b>                                                                                      | 150G             | squares & bars                                                                                                   |

|                                                     |      |                                                                                                             |
|-----------------------------------------------------|------|-------------------------------------------------------------------------------------------------------------|
| 8                                                   | 150H | sweet rolls and breads                                                                                      |
| 8                                                   | 150I | filled crepes, bintzes, cobblers                                                                            |
| FROZEN DAIRY PRODUCTS - 09                          |      |                                                                                                             |
| 9                                                   | 09A  | ice cream                                                                                                   |
| 9                                                   | 09B  | ice milk                                                                                                    |
| 9                                                   | 09C  | frozen yoghurt                                                                                              |
| MILKS - 10                                          |      |                                                                                                             |
| 10                                                  | 10A  | milk, whole                                                                                                 |
| 10                                                  | 10B  | milk, 2%                                                                                                    |
| 10                                                  | 10C  | milk, 1%                                                                                                    |
| 10                                                  | 10D  | milk, skim                                                                                                  |
| 10                                                  | 10E  | milk, evaporated, whole                                                                                     |
| 10                                                  | 10F  | milk, evaporated, 2%                                                                                        |
| 10                                                  | 10G  | milk, evaporated, skim                                                                                      |
| 10                                                  | 10H  | milk, condensed                                                                                             |
| 10                                                  | 10I  | other types of milk (whey, buttermilk)                                                                      |
| 10                                                  | 10J  | plant-based beverage (soy, almond, coconut)                                                                 |
| 10                                                  | 10K  | goat and sheep milk                                                                                         |
| CREAMS - 13                                         |      |                                                                                                             |
| 13                                                  | 13A  | whipping cream                                                                                              |
| 13                                                  | 13B  | table cream                                                                                                 |
| 13                                                  | 13C  | half & half cream                                                                                           |
| 13                                                  | 13D  | sour cream                                                                                                  |
| CHEESES - 14                                        |      |                                                                                                             |
| 14                                                  | 14A  | cottage cheese                                                                                              |
| 14                                                  | 14B  | cheese, less than 10% B.F.                                                                                  |
| 14                                                  | 14C  | cheese, 10% B.F. to 25% B.F.                                                                                |
| 14                                                  | 14D  | cheese, more than 25% B.F.                                                                                  |
| YOGURTS (NATURAL AND WITH FRUIT) - 15               |      |                                                                                                             |
| 15                                                  | 15A  | yoghurts, less than 2% B.F.                                                                                 |
| 15                                                  | 15B  | yoghurts, more than 2.1% B.F.                                                                               |
| EGGS - 16                                           |      |                                                                                                             |
| 16                                                  | 16A  | egg                                                                                                         |
| 16                                                  | 16B  | egg substitutes                                                                                             |
| BUTTERS - 17                                        |      |                                                                                                             |
| 17                                                  | 17A  | butter                                                                                                      |
| MARGARINES + OTHER FATS & SPREADS - 18, 20, 21 = 18 |      |                                                                                                             |
| 18                                                  | 18A  | regular tub margarine                                                                                       |
| 18                                                  | 18B  | calorie-reduced tub margarine                                                                               |
| 18                                                  | 20A  | block margarine                                                                                             |
| 18                                                  | 21A  | vegetable oils                                                                                              |
| 18                                                  | 21B  | animal fats                                                                                                 |
| 18                                                  | 21C  | shortening                                                                                                  |
| 18                                                  | 227A | those in the ingredient column - we think this is an error in the database, but these are all fats and oils |

|    |                                                          |                                                         |
|----|----------------------------------------------------------|---------------------------------------------------------|
|    | RED MEATS - 22, 23, 24, 25, 28, 29, 30, 31, 32 = 22      |                                                         |
| 22 | 22A                                                      | beef, lean only                                         |
| 22 | 22B                                                      | beef, lean + fat                                        |
| 22 | 22C                                                      | beef, ground                                            |
| 22 | 23A                                                      | veal, lean only                                         |
| 22 | 23B                                                      | veal, lean + fat (incl ground veal)                     |
| 22 | 24A                                                      | lamb, lean only                                         |
| 22 | 24B                                                      | lamb, lean + fat (incl ground lamb)                     |
| 22 | 25A                                                      | pork, fresh, lean only                                  |
| 22 | 25B                                                      | pork, fresh, lean + fat                                 |
| 22 | 25C                                                      | bacon                                                   |
| 22 | 25D                                                      | ham, cured, lean only                                   |
| 22 | 25E                                                      | ham, cured, lean + fat                                  |
| 22 | 28A                                                      | liver                                                   |
| 22 | 28B                                                      | liver pate                                              |
| 22 | 29A                                                      | offal                                                   |
| 22 | 31A                                                      | game meat                                               |
|    | SAUSAGE + LUNCHEON MEATS (SOME SUGAR ADDED) - 30+32 = 23 |                                                         |
| 23 | 30A                                                      | sausage                                                 |
| 23 | 32A                                                      | luncheon meat                                           |
|    | POULTRY - 27                                             |                                                         |
| 27 | 27A                                                      | chicken, meat only                                      |
| 27 | 27B                                                      | chicken, meat + skin                                    |
| 27 | 27C                                                      | turkey, meat only                                       |
| 27 | 27D                                                      | turkey, meat + skin (incl ground turkey)                |
| 27 | 27E                                                      | other birds (duck, pheasant, pigeon)                    |
| 27 | 27F                                                      | birds, skin only                                        |
|    | NUTS, SEEDS AND PEANUT BUTTER - 33                       |                                                         |
| 33 | 33A                                                      | nuts                                                    |
| 33 | 33B                                                      | seeds                                                   |
| 33 | 33C                                                      | peanut butter and other nut spreads                     |
|    | FISH + SHELLFISHES - 34, 35 = 34                         |                                                         |
| 34 | 34A                                                      | fish, less than 6% total fat                            |
| 34 | 34B                                                      | fish, superior or equal to 6% total fat                 |
| 34 | 35A                                                      | shellfish                                               |
|    | VEGETABLES - 36                                          |                                                         |
| 36 | 36A                                                      | beans                                                   |
| 36 | 36B                                                      | broccoli                                                |
| 36 | 36C                                                      | cabbage and kale                                        |
| 36 | 36D                                                      | cauliflower                                             |
| 36 | 36E                                                      | carrots                                                 |
| 36 | 36F                                                      | celery                                                  |
| 36 | 36G                                                      | corn                                                    |
| 36 | 36H                                                      | lettuces & leafy greens (spinach, mustard greens, etc.) |

|                                                 |     |                                                                        |
|-------------------------------------------------|-----|------------------------------------------------------------------------|
| 36                                              | 36I | mushrooms                                                              |
| 36                                              | 36J | onion, green onions, leeks, garlic                                     |
| 36                                              | 36K | beans and snow peas                                                    |
| 36                                              | 36L | peppers, red & green                                                   |
| 36                                              | 36M | squashes                                                               |
| 36                                              | 36N | tomatoes                                                               |
| 36                                              | 36O | juices, tomato & vegetable                                             |
| 36                                              | 36P | other veg (cucumber, immature beans, brussels sprouts, beets, turnips) |
| VEG SOUPS - 501                                 |     |                                                                        |
| 501                                             | 50A | soups with vegetables                                                  |
| 501                                             | 50B | soups without vegetables                                               |
| LEGUMES - 37                                    |     |                                                                        |
| 37                                              | 37A | legume                                                                 |
| 37                                              | 37B | foods made with vegetable proteins (tofu)                              |
| POTATOES, FRIED - 38                            |     |                                                                        |
| 38                                              | 38A | potato chips                                                           |
| 38                                              | 38B | fried or roasted potatoes                                              |
| POTATOES, RAW AND COOKED (EXCLUDING FRIED) - 39 |     |                                                                        |
| 39                                              | 39A | potato                                                                 |
| FRUIT - 40                                      |     |                                                                        |
| 40                                              | 40A | citrus fruits                                                          |
| 40                                              | 40B | apple                                                                  |
| 40                                              | 40C | banana                                                                 |
| 40                                              | 40D | cherries                                                               |
| 40                                              | 40E | grapes and raisins                                                     |
| 40                                              | 40F | melons                                                                 |
| 40                                              | 40G | peaches, nectarines                                                    |
| 40                                              | 40H | pears                                                                  |
| 40                                              | 40I | pineapple                                                              |
| 40                                              | 40J | plums and prunes                                                       |
| 40                                              | 40K | strawberries                                                           |
| 40                                              | 40L | other fruits (blueberries, dates, kiwis, fruit salads, etc)            |
| SUGARS, SYRUPS AND PRESERVES - 41               |     |                                                                        |
| 41                                              | 41A | sugars (white and brown)                                               |
| 41                                              | 41B | jams, jellies and marmalade                                            |
| 41                                              | 41C | other sugars (syrups, molasses, honey, etc)                            |
| 41                                              | 41D | sugar substitutes                                                      |
| SAVORY SNACKS - 42                              |     |                                                                        |
| 42                                              | 42A | popcorn, plain & pretzels                                              |
| 42                                              | 42B | salty and high fat snacks (incl tortilla chips)                        |
| CONFECTIONARY - 43 + 44 = 43                    |     |                                                                        |
| 43                                              | 43A | candies, gums, etc                                                     |
| 43                                              | 43B | ice pop, sherbet                                                       |
| 43                                              | 43C | gelatin, dessert toppings and pudding mixes, commercial                |

|    |                                                      |                                                           |
|----|------------------------------------------------------|-----------------------------------------------------------|
| 43 | 44A                                                  | chocolate bar                                             |
|    | FRUIT JUICE - 45                                     |                                                           |
| 45 | 45A                                                  | fruit juice                                               |
|    | ALCOHOLIC BEVERAGES - 47, 48, 49 = 47                |                                                           |
| 47 | 47A                                                  | spirits                                                   |
| 47 | 47B                                                  | liqueurs                                                  |
| 47 | 48A                                                  | wine                                                      |
| 47 | 49A                                                  | beer                                                      |
| 47 | 49B                                                  | ciders and coolers                                        |
|    | CONDIMENTS + GRAVIES – 50+53 =50                     |                                                           |
| 50 | 50C                                                  | gravies                                                   |
| 50 | 50D                                                  | sauces (white, bearnaise, soya, tartar, ketchup, etc)     |
| 50 | 50E                                                  | salad dressings (with or without oil)                     |
| 50 | 50F                                                  | seasonings (salt, vinegar, etc)                           |
| 50 | 53A                                                  | spices                                                    |
| 50 | 53B                                                  | others (baking soda, baking power, yeast, etc)            |
|    | TEA + COFFEE – 51+231B+231C = 51                     |                                                           |
| 51 | 51A                                                  | tea (incl iced tea)                                       |
| 51 | 51B                                                  | coffee                                                    |
| 51 | 51C                                                  | water                                                     |
| 51 | 231B                                                 | tea (recipe sub-group)                                    |
| 51 | 231C                                                 | coffee (recipe sub-group)                                 |
|    | BABYFOOD PRODUCTS - 52                               |                                                           |
| 52 | 52A                                                  | babyfood product                                          |
| 52 | 52B                                                  | infant formula                                            |
|    | SUPPLEMENTED BARS, SHAKES AND MEAL REPLACEMENTS - 54 |                                                           |
| 54 | 54A                                                  | energy bar                                                |
| 54 | 54B                                                  | protein bar and shake                                     |
| 54 | 54C                                                  | meal replacements                                         |
|    | SOFT DRINKS - REGULAR – 46A = 60                     |                                                           |
| 60 | 46A                                                  | soft drinks - regular                                     |
|    | SOFT DRINKS - DIET -46B = 61                         |                                                           |
| 61 | 46B                                                  | soft drinks - diet                                        |
|    | FRUIT DRINKS – 46C = 62                              |                                                           |
| 62 | 46C                                                  | fruit drinks                                              |
|    | OTHER BEVERAGES - 46D-G + 231D = 63                  |                                                           |
| 63 | 46D                                                  | other beverages (malted milk, chocolate beverage)         |
| 63 | 46E                                                  | energy drink                                              |
| 63 | 46F                                                  | vitamin water                                             |
| 63 | 46G                                                  | sports drink                                              |
|    |                                                      | milk-based beverage (milk shakes, malted milk, hot cocoa, |
| 63 | 231D                                                 | instant breakfast, etc)                                   |

**Supplemental Table S2.** Demographic information of the study population (n=11,817)

|                                | Frequency |     | Total Sugars<br>(%E) |     | P-value <sup>b</sup> |
|--------------------------------|-----------|-----|----------------------|-----|----------------------|
|                                | n         | %   | Mean <sup>a</sup>    | SE  |                      |
| <b>Sex</b>                     |           |     |                      |     | <b>&lt;0.0001</b>    |
| Male                           | 5670      | 48% | 18.0                 | 0.2 |                      |
| Female                         | 6147      | 52% | 19.7                 | 0.2 |                      |
| <b>Age/sex groupings</b>       |           |     |                      |     | <b>0.012</b>         |
| Male 19 to 30 years            | 765       | 6%  | 17.4                 | 1.1 |                      |
| Female 19 to 30 years          | 757       | 6%  | 20.7                 | 0.6 |                      |
| Male 31 to 50 years            | 1839      | 16% | 18.3                 | 0.4 |                      |
| Female 31 to 50 years          | 1945      | 16% | 19.1                 | 0.4 |                      |
| Male 51 to 70 years            | 1961      | 17% | 17.5                 | 0.4 |                      |
| Female 51 to 70 years          | 2105      | 18% | 19.4                 | 0.3 |                      |
| Male 71 or older               | 1105      | 9%  | 19.6                 | 0.7 |                      |
| Female 71 or older             | 1340      | 11% | 20.8                 | 0.8 |                      |
| <b>Type of smoker</b>          |           |     |                      |     | <b>0.759</b>         |
| Daily                          | 1749      | 15% | 19.2                 | 0.5 |                      |
| Occasionally                   | 540       | 5%  | 17.6                 | 0.9 |                      |
| Not at all                     | 9519      | 81% | 18.8                 | 0.2 |                      |
| <b>Self-perceived health</b>   |           |     |                      |     | <b>0.034</b>         |
| Excellent                      | 2209      | 19% | 18.4                 | 0.3 |                      |
| Very good                      | 4391      | 37% | 18.8                 | 0.3 |                      |
| Good                           | 3705      | 31% | 18.8                 | 0.3 |                      |
| Fair                           | 1178      | 10% | 20.0                 | 1.0 |                      |
| Poor                           | 321       | 3%  | 20.6                 | 1.9 |                      |
| <b>Has high blood pressure</b> |           |     |                      |     | <b>0.160</b>         |
| Yes                            | 2888      | 24% | 18.4                 | 0.3 |                      |
| No                             | 8899      | 75% | 18.9                 | 0.2 |                      |
| <b>Has diabetes</b>            |           |     |                      |     | <b>0.006</b>         |
| Yes                            | 1092      | 9%  | 17.3                 | 0.5 |                      |
| No                             | 10707     | 91% | 18.9                 | 0.2 |                      |
| <b>Has heart disease</b>       |           |     |                      |     | <b>0.687</b>         |
| Yes                            | 788       | 7%  | 20.1                 | 0.6 |                      |
| No                             | 10996     | 93% | 18.8                 | 0.2 |                      |

|                                                                                   |       |     |      |     |        |
|-----------------------------------------------------------------------------------|-------|-----|------|-----|--------|
| <b>Has cancer</b>                                                                 |       |     |      |     | 0.662  |
| Yes                                                                               | 290   | 2%  | 19.7 | 0.8 |        |
| No                                                                                | 11504 | 97% | 18.8 | 0.2 |        |
| <b>Has osteoporosis<sup>c</sup></b>                                               |       |     |      |     | 0.507  |
| Yes                                                                               | 793   | 7%  | 19.7 | 1.9 |        |
| No                                                                                | 5915  | 50% | 18.9 | 0.2 |        |
| <b>Body Mass Index</b>                                                            |       |     |      |     | 0.584* |
| 18.5 to <25 kg/m2                                                                 | 3826  | 32% | 18.8 | 0.4 |        |
| 25 to <30 kg/m2                                                                   | 4359  | 37% | 19.0 | 0.3 |        |
| 30 to <35 kg/m2                                                                   | 2315  | 20% | 19.1 | 0.4 |        |
| 35 to <40 kg/m2                                                                   | 850   | 7%  | 18.1 | 1.3 |        |
| 40 and over kg/m2                                                                 | 467   | 4%  | 17.8 | 0.7 |        |
| <b>Highest level of education</b>                                                 |       |     |      |     | 0.711  |
| Less than high school diploma or its equivalent                                   | 1934  | 16% | 19.1 | 0.9 |        |
| High school diploma or a high school equivalency certificate                      | 3043  | 26% | 19.2 | 0.3 |        |
| Certificate/diploma - trade/college/non-university/university below Bachelor's    | 3924  | 33% | 18.3 | 0.2 |        |
| Bachelor's degree or university certificate/diploma/degree above Bachelor's level | 2846  | 24% | 19.0 | 0.3 |        |
| <b>Income</b>                                                                     |       |     |      |     | 0.188  |
| \$0 - \$19,999                                                                    | 1311  | 11% | 20.1 | 0.7 |        |
| \$20,000 - \$39,999                                                               | 2503  | 21% | 18.9 | 1.1 |        |
| \$40,000 - \$59,999                                                               | 2114  | 18% | 19.4 | 0.5 |        |
| \$60,000 - \$79,999                                                               | 1651  | 14% | 19.3 | 0.5 |        |
| \$80,000 - \$99,999                                                               | 1183  | 10% | 18.6 | 0.5 |        |
| \$100,000 - \$119,999                                                             | 970   | 8%  | 17.7 | 0.9 |        |
| \$120,000 - \$139,999                                                             | 617   | 5%  | 18.1 | 0.7 |        |
| \$140,000 and higher                                                              | 1461  | 12% | 18.4 | 0.5 |        |

a adjusted for misreporting

b P-values of the association between covariates and total sugars intake as % of energy, significant if p<0.05

c Respondents aged 50 and over

\*When assessed as a continuous variable, p= 0.586 for the association with total sugars (%E)

The number of responses which did not indicate a selected option (i.e. "valid skip", "refusal", "don't know", "not stated" responses) were the following: type of smoker (n=9, 0.1%), self-perceived health (n=13, 0.1%), has high blood pressure (n=30, 0.3%), has diabetes (n=18, 0.2%),

has heart disease (n=33, 0.3%), has cancer (n=23, 0.2%), has osteoporosis (n=5109, 43.2%, the majority of which is because this only included responses from women  $\geq 50$ y), highest level of education (n=70, 0.6%), income (n=7, 0.1%).



**Supplementary Table S3.** Adjusted means (g/day) and confidence intervals of non-essential food categories and confidence intervals by quintiles of total sugars intake (% energy) in all adults (n=11,817) in Models 1 and 2\*

|                                              | Q1      |              |                   |              | Q3      |              |                   |              | Q5      |              |         |              | Model 1        | Model 2        |
|----------------------------------------------|---------|--------------|-------------------|--------------|---------|--------------|-------------------|--------------|---------|--------------|---------|--------------|----------------|----------------|
|                                              | n=2,364 |              |                   |              | n=2,363 |              |                   |              | n=2,364 |              |         |              |                |                |
|                                              | Model 1 |              | Model 2           |              | Model 1 |              | Model 2           |              | Model 1 |              | Model 2 |              |                |                |
| Food Category                                | Mean    | 95% CI       | Mean              | 95% CI       | Mean    | 95% CI       | Mean              | 95% CI       | Mean    | 95% CI       | Mean    | 95% CI       | p-values<br>** | p-values<br>** |
| Creams                                       | 8.3     | 6.0, 10.5    | 8.4               | 6.3, 10.4    | 7.2     | 5.9, 8.4     | 7.4               | 6.1, 8.7     | 6.8     | 5.4, 8.1     | 7.0     | 5.7, 8.4     | 0.5611         | 0.592          |
| Cheeses                                      | 36.6    | 31.6, 41.3   | 35.8 <sup>y</sup> | 31.6, 40.0   | 25.4    | 21.9, 28.9   | 24.7              | 22.5, 27.0   | 16.8    | 13.6, 20.1   | 17.8    | 14.7, 21.0   | <.0001         | 0.002          |
| Eggs                                         | 33.8    | 25.5, 42.1   | 31.7 <sup>y</sup> | 25.6, 37.9   | 24.4    | 21.4, 27.4   | 22.9 <sup>y</sup> | 19.9, 25.9   | 15.0    | 12.8, 17.2   | 15.3    | 12.8, 17.9   | <.0001         | <.0001         |
| Butters                                      | 3.3     | 2.2, 4.4     | 3.5               | 2.2, 4.8     | 3.2     | 2.6, 3.7     | 3.3               | 2.8, 3.8     | 2.5     | 1.8, 3.2     | 2.8     | 2.0, 3.5     | 0.0267         | 0.069          |
| Margarines, other fats, spreads              | 15.4    | 12.8, 18.0   | 14.9 <sup>y</sup> | 12.7, 17.1   | 12.0    | 11.1, 12.9   | 11.7 <sup>y</sup> | 10.8, 12.5   | 7.9     | 7.1, 8.6     | 8.2     | 7.5, 8.9     | <.0001         | <.0001         |
| Red meats                                    | 60.6    | 52.1, 69.0   | 57.6 <sup>y</sup> | 50.2, 65.0   | 48.9    | 42.8, 54.9   | 48.5 <sup>y</sup> | 43.3, 53.6   | 33.3    | 28.3, 38.2   | 35.8    | 31.6, 40.0   | <.0001         | <.0001         |
| Sausage, luncheon meats                      | 22.2    | 18.1, 26.4   | 21.4 <sup>y</sup> | 16.6, 26.2   | 18.4    | 14.5, 22.4   | 19.1              | 16.1, 22.0   | 13.2    | 10.5, 16.0   | 14.5    | 11.4, 17.6   | 0.0009         | 0.006          |
| Poultry                                      | 58.0    | 45.8, 70.2   | 53.5 <sup>y</sup> | 43.3, 63.6   | 48.2    | 39.1, 57.2   | 44.6 <sup>y</sup> | 36.5, 52.7   | 31.4    | 25.4, 37.4   | 31.5    | 24.0, 39.0   | <.0001         | <.0001         |
| Nuts, seeds, peanut butter                   | 13.4    | 9.8, 17.1    | 13.1 <sup>y</sup> | 9.9, 16.2    | 11.4    | 9.4, 13.4    | 10.9 <sup>y</sup> | 9.3, 12.5    | 7.1     | 5.3, 8.8     | 7.6     | 5.9, 9.3     | <.0001         | <.0001         |
| Fish, shellfish                              | 23.3    | 16.0, 30.7   | 22.3              | 16.8, 27.8   | 20.4    | 14.4, 26.4   | 19.2              | 14.2, 24.2   | 12.4    | 7.7, 17.2    | 12.8    | 8.6, 17.0    | 0.0035         | 0.009          |
| Vegetables, vegetable soups                  | 160.1   | 145.5, 174.6 | 157.0             | 143.8, 170.3 | 170.3   | 155.1, 185.4 | 164.9             | 148.5, 181.4 | 168.6   | 148.6, 188.6 | 169.5   | 150.6, 188.5 | 0.6069         | 0.629          |
| Legumes                                      | 15.5    | 10.7, 20.2   | 13.4              | 9.0, 17.7    | 13.9    | 10.8, 16.9   | 11.6              | 8.5, 14.6    | 9.0     | 4.7, 13.2    | 8.2     | 3.7, 12.7    | 0.161          | 0.431          |
| Potatoes, fried                              | 19.9    | 15.5, 24.3   | 18.8 <sup>y</sup> | 14.8, 22.7   | 15.3    | 8.4, 22.2    | 15.2              | 9.8, 20.5    | 9.4     | 7.2, 11.6    | 9.8     | 7.6, 12.7    | 0.0002         | 0.001          |
| Potatoes, raw and cooked                     | 38.7    | 32.2, 45.2   | 41.7 <sup>y</sup> | 34.6, 48.8   | 35.3    | 30.0, 40.7   | 38.3              | 32.6, 44.0   | 26.2    | 21.7, 30.6   | 29.8    | 24.6, 34.9   | <.0001         | 0.001          |
| Savory snacks                                | 6.5     | 4.5, 8.5     | 6.3               | 4.0, 8.7     | 4.8     | 3.5, 6.1     | 4.5               | 3.3, 5.7     | 3.9     | 2.6, 5.2     | 4.0     | 2.8, 5.3     | 0.4455         | 0.656          |
| Condiments, gravies                          | 29.5    | 26.6, 32.3   | 28.1 <sup>y</sup> | 25.2, 31.0   | 26.9    | 23.7, 30.0   | 26.4 <sup>y</sup> | 23.9, 28.8   | 21.6    | 19.3, 24.0   | 21.8    | 19.5, 24.0   | 0.001          | 0.003          |
| Supplemented bars, shakes, meal replacements | 3.4     | 2.0, 4.8     | 3.5               | 2.1, 4.8     | 4.5     | 3.1, 6.0     | 4.4               | 2.8, 6.0     | 5.9     | 2.9, 8.8     | 6.0     | 3.1, 9.0     | 0.057          | 0.060          |
| Soups                                        | 39.3    | 32.3, 46.3   | 41.5              | 34.2, 48.7   | 39.6    | 26.5, 52.7   | 41.3              | 27.7, 54.9   | 41.7    | 30.8, 52.6   | 43.1    | 33.4, 52.8   | 0.0571         | 0.088          |

\* Intake of food categories across quintiles of total sugars intake (as % energy) were compared using a general linear model (PROC SURVEYREG) including the following covariates: Model 1, misreporting status (determined using previously published methods by Garriguet [47]); Model 2, misreporting status plus age, sex, smoking, self, perceived health, blood pressure, diabetes, heart disease, cancer, osteoporosis, education, physical activity, income, BMI, immigrant status, weekend reference day and total energy intake. Note: Quintiles 2 and 4 are not presented for readability.

\*\* The p-value represents the global p-value for a significant difference across quintiles of intake of total sugars (%E)

<sup>¶</sup> significant difference compared to Q5 in post-hoc comparison with Bonferroni adjustment in Model 3 (p<0.05)

<sup>£</sup> significant difference compared to Q3 in post-hoc comparison with Bonferroni adjustment in Model 3 (p<0.05)

CI, confidence interval.

**Supplementary Table S4.** Means and standard errors of the intakes from all food categories by quintiles of total sugars intake (% energy) in all adults (g/day) (n=11,817)\*.

|                                             | <b>Q1</b>               |           | <b>Q3</b>     |           | <b>Q5</b>     |           |
|---------------------------------------------|-------------------------|-----------|---------------|-----------|---------------|-----------|
|                                             | <b>n=2364</b>           |           | <b>n=2363</b> |           | <b>n=2364</b> |           |
| <b>Food Category</b>                        | <b>Mean</b>             | <b>SE</b> | <b>Mean</b>   | <b>SE</b> | <b>Mean</b>   | <b>SE</b> |
| Creams                                      | <b>8.3</b>              | 1.2       | <b>7.2</b>    | 0.6       | <b>6.8</b>    | 0.7       |
| Pasta, rice, cereal grains and flour        | <b>112.3</b>            | 14.6      | <b>83.9</b>   | 6.2       | <b>53.6</b>   | 6.2       |
| White breads                                | <b>21.0</b>             | 1.7       | <b>31.2</b>   | 4.4       | <b>22.9</b>   | 1.7       |
| Wholemeal breads                            | <b>21.6</b>             | 1.8       | <b>21.7</b>   | 3.0       | <b>16.6</b>   | 1.9       |
| Other breads                                | <b>43.9</b>             | 3.7       | <b>35.4</b>   | 4.9       | <b>26.7</b>   | 2.6       |
| Wholegrain and high fibre breakfast cereals | <b>15.0</b>             | 3.6       | <b>19.7</b>   | 3.1       | <b>18.6</b>   | 1.7       |
| Other breakfast cereals                     | <b>1.1</b>              | 0.5       | <b>1.9</b>    | 0.6       | <b>2.8</b>    | 0.6       |
| Cookies, biscuits and granola bars          | <b>7.0</b>              | 1.2       | <b>10.1</b>   | 1.0       | <b>11.2</b>   | 1.0       |
| Cakes, pies, danishes and other pastries    | <b>13.3</b>             | 1.8       | <b>30.4</b>   | 2.7       | <b>35.7</b>   | 3.6       |
| Frozen dairy products                       | <b>2.3</b>              | 0.6       | <b>16.1</b>   | 4.1       | <b>22.6</b>   | 2.5       |
| Milks                                       | <b>58.7</b>             | 4.7       | <b>170.7</b>  | 8.4       | <b>190.5</b>  | 14.8      |
| Yogurts (natural and with fruits)           | <b>11.4</b>             | 2.2       | <b>26.8</b>   | 4.0       | <b>33.3</b>   | 3.2       |
| Fruit                                       | <b>59.7</b>             | 4.0       | <b>160.4</b>  | 7.8       | <b>223.6</b>  | 10.8      |
| Sugars, syrups, preserves                   | <b>4.4</b>              | 0.4       | <b>10.7</b>   | 0.8       | <b>20.4</b>   | 1.9       |
| Confectionary                               | <b>2.5</b>              | 0.4       | <b>9.1</b>    | 1.6       | <b>24.2</b>   | 3.4       |
| Fruit juice                                 | <b>23.4</b>             | 3.9       | <b>58.9</b>   | 4.0       | <b>112.6</b>  | 8.1       |
| Alcoholic beverages                         | <b>326.8</b>            | 42.1      | <b>116.2</b>  | 18.7      | <b>52.5</b>   | 9.0       |
| Tea, coffee                                 | <b>1511.1</b>           | 35.7      | <b>1555.6</b> | 48.2      | <b>1308.7</b> | 34.7      |
| Soft drinks, regular                        | <b>24.5</b>             | 4.5       | <b>60.6</b>   | 6.1       | <b>190.4</b>  | 26.0      |
| Soft drinks, diet                           | <b>55.4</b>             | 8.7       | <b>40.6</b>   | 11.4      | <b>21.8</b>   | 5.4       |
| Fruit drinks                                | <b>11.1<sup>‡</sup></b> | 3.6       | <b>18.2</b>   | 4.1       | <b>53.5</b>   | 6.9       |

|                                                 |              |     |              |     |              |      |
|-------------------------------------------------|--------------|-----|--------------|-----|--------------|------|
| Other beverages                                 | <b>3.4</b>   | 1.3 | <b>9.5</b>   | 4.9 | <b>27.1</b>  | 15.5 |
| Cheeses                                         | <b>36.6</b>  | 2.6 | <b>25.4</b>  | 1.8 | <b>16.8</b>  | 1.7  |
| Eggs                                            | <b>33.8</b>  | 4.2 | <b>24.4</b>  | 1.5 | <b>15.0</b>  | 1.1  |
| Butters                                         | <b>3.3</b>   | 0.6 | <b>3.2</b>   | 0.3 | <b>2.5</b>   | 0.4  |
| Margarines, other fats, spreads                 | <b>15.4</b>  | 1.3 | <b>12.0</b>  | 0.5 | <b>7.9</b>   | 0.4  |
| Red meats                                       | <b>60.6</b>  | 4.3 | <b>48.9</b>  | 3.1 | <b>33.3</b>  | 2.5  |
| Sausage, luncheon meats                         | <b>22.2</b>  | 2.1 | <b>18.4</b>  | 2.0 | <b>13.2</b>  | 1.4  |
| Poultry                                         | <b>58.0</b>  | 6.2 | <b>48.2</b>  | 4.6 | <b>31.4</b>  | 3.1  |
| Nuts, seeds, peanut butter                      | <b>13.4</b>  | 1.9 | <b>11.4</b>  | 1.0 | <b>7.1</b>   | 0.9  |
| Fish, shellfish                                 | <b>23.3</b>  | 3.7 | <b>20.4</b>  | 3.1 | <b>12.4</b>  | 2.4  |
| Vegetables, vegetable soups                     | <b>160.1</b> | 7.4 | <b>170.3</b> | 7.7 | <b>168.6</b> | 10.2 |
| Legumes                                         | <b>15.5</b>  | 2.4 | <b>13.9</b>  | 1.6 | <b>9.0</b>   | 2.2  |
| Potatoes, fried                                 | <b>19.9</b>  | 2.2 | <b>15.3</b>  | 3.5 | <b>9.4</b>   | 1.1  |
| Potatoes, raw and cooked                        | <b>38.7</b>  | 3.3 | <b>35.3</b>  | 2.7 | <b>26.2</b>  | 2.3  |
| Savory snacks                                   | <b>6.5</b>   | 1.0 | <b>4.8</b>   | 0.6 | <b>3.9</b>   | 0.7  |
| Condiments, gravies                             | <b>29.5</b>  | 1.5 | <b>26.9</b>  | 1.6 | <b>21.6</b>  | 1.2  |
| Baby food products                              | <b>0.1</b>   | 0.2 | <b>0.3</b>   | 0.3 | <b>0.2</b>   | 0.8  |
| Supplemented bars, shakes,<br>meal replacements | <b>3.4</b>   | 0.7 | <b>4.5</b>   | 0.7 | <b>5.9</b>   | 1.5  |
| Soups                                           | <b>39.3</b>  | 3.6 | <b>39.6</b>  | 6.7 | <b>41.7</b>  | 5.5  |

SE, standard error.

**Table S5.** Means and standard errors of intakes from macro- and micronutrients by quintiles of total sugars intake (% energy) in all adults (n=11,817)\*.

|                            | <b>Q1</b>                |           | <b>Q3</b>                 |           | <b>Q5</b>     |           | <b>ALL</b>      |           |
|----------------------------|--------------------------|-----------|---------------------------|-----------|---------------|-----------|-----------------|-----------|
|                            | <b>n=2364</b>            |           | <b>n=2363</b>             |           | <b>n=2364</b> |           | <b>n=11,817</b> |           |
|                            | <b>Mean</b>              | <b>SE</b> | <b>Mean</b>               | <b>SE</b> | <b>Mean</b>   | <b>SE</b> | <b>Mean</b>     | <b>SE</b> |
| Energy (kcal)              | <b>1953.8</b>            | 25.4      | <b>1919.2<sup>‡</sup></b> | 50.5      | <b>1805.5</b> | 21.2      | <b>1890.1</b>   | 20.4      |
| Carbohydrates (%)          | <b>38.9<sup>‡£</sup></b> | 0.8       | <b>47.7<sup>‡</sup></b>   | 0.9       | <b>58.4</b>   | 0.4       | <b>47.7</b>     | 0.7       |
| Total Fibre (g/1000 kcal)  | <b>8.6<sup>‡£</sup></b>  | 0.2       | <b>10.1</b>               | 0.4       | <b>10.3</b>   | 0.2       | <b>9.7</b>      | 0.2       |
| Total Sugars (%)           | <b>7.9<sup>‡£</sup></b>  | 0.1       | <b>18.3<sup>‡</sup></b>   | 0.01      | <b>33.0</b>   | 0.3       | <b>18.8</b>     | 0.2       |
| Natural Sugars (%)         | <b>4.8<sup>‡£</sup></b>  | 0.1       | <b>10.2<sup>‡</sup></b>   | 0.2       | <b>15.6</b>   | 0.3       | <b>10.1</b>     | 0.1       |
| Added Sugars (%)           | <b>3.0<sup>‡£</sup></b>  | 0.1       | <b>8.1<sup>‡</sup></b>    | 0.3       | <b>17.3</b>   | 0.4       | <b>8.6</b>      | 0.1       |
| Free Sugars (%)            | <b>3.2<sup>‡£</sup></b>  | 0.1       | <b>9.2<sup>‡</sup></b>    | 0.3       | <b>20.1</b>   | 0.4       | <b>9.9</b>      | 0.1       |
| Fat (%)                    | <b>36.1<sup>‡£</sup></b> | 0.5       | <b>32.2<sup>‡</sup></b>   | 0.5       | <b>26.4</b>   | 0.4       | <b>32.2</b>     | 0.6       |
| Saturated Fat (%)          | <b>11.3<sup>‡£</sup></b> | 0.2       | <b>10.4<sup>‡</sup></b>   | 0.3       | <b>9.0</b>    | 0.1       | <b>10.4</b>     | 0.2       |
| Monounsaturated Fat (%)    | <b>13.8<sup>‡£</sup></b> | 0.2       | <b>12.0<sup>‡</sup></b>   | 0.3       | <b>9.4</b>    | 0.2       | <b>12.0</b>     | 0.2       |
| Polyunsaturated Fat (%)    | <b>7.8<sup>‡£</sup></b>  | 0.2       | <b>6.8<sup>‡</sup></b>    | 0.1       | <b>5.5</b>    | 0.1       | <b>6.9</b>      | 0.2       |
| Linoleic acid (%)          | <b>6.6<sup>‡£</sup></b>  | 0.2       | <b>5.7<sup>‡</sup></b>    | 0.1       | <b>4.6</b>    | 0.1       | <b>5.9</b>      | 0.2       |
| Alpha-linolenic Acid (%)   | <b>0.8<sup>‡</sup></b>   | 0.01      | <b>0.8<sup>‡</sup></b>    | 0.01      | <b>0.6</b>    | 0.01      | <b>0.7</b>      | 0.01      |
| Protein (%)                | <b>18.8<sup>‡</sup></b>  | 0.4       | <b>17.5<sup>‡</sup></b>   | 0.2       | <b>13.9</b>   | 0.3       | <b>17.0</b>     | 0.2       |
| Cholesterol (mg/1000 kcal) | <b>178.1<sup>‡</sup></b> | 7.9       | <b>153.2<sup>‡</sup></b>  | 7.0       | <b>109.9</b>  | 4.4       | <b>147.0</b>    | 2.1       |
| Alcohol (%)                | <b>6.2<sup>‡£</sup></b>  | 0.7       | <b>2.6<sup>‡</sup></b>    | 0.3       | <b>1.3</b>    | 0.3       | <b>3.1</b>      | 0.3       |
| Vitamin A (ug RAE)         | <b>338.9<sup>£</sup></b> | 20.6      | <b>370.6</b>              | 10.6      | <b>378.7</b>  | 19.3      | <b>367.9</b>    | 10.3      |
| Thiamin (mg)               | <b>0.9</b>               | 0.01      | <b>0.9</b>                | 0.01      | <b>0.8</b>    | 0.01      | <b>0.9</b>      | 0.0       |
| Riboflavin (mg)            | <b>1.0<sup>£</sup></b>   | 0.01      | <b>1.1</b>                | 0.01      | <b>1.1</b>    | 0.01      | <b>1.1</b>      | 0.0       |
| Niacin (mg)                | <b>23.7<sup>‡£</sup></b> | 0.6       | <b>21.7<sup>‡</sup></b>   | 0.4       | <b>18.0</b>   | 0.3       | <b>21.4</b>     | 0.3       |
| Vitamin B-6 (mg)           | <b>0.9</b>               | 0.01      | <b>1.0</b>                | 0.0       | <b>0.9</b>    | 0.01      | <b>0.9</b>      | 0.01      |
| Folate (ug DFE)            | <b>247.8<sup>‡</sup></b> | 4.6       | <b>242.8<sup>‡</sup></b>  | 7.5       | <b>221.9</b>  | 5.7       | <b>240.7</b>    | 2.5       |
| Vitamin B-12 (mg)          | <b>2.3</b>               | 0.1       | <b>2.4<sup>‡</sup></b>    | 0.1       | <b>1.9</b>    | 0.1       | <b>2.2</b>      | 0.1       |

|                 |                            |      |                           |      |               |      |               |      |
|-----------------|----------------------------|------|---------------------------|------|---------------|------|---------------|------|
| Vitamin C (mg)  | <b>35.9<sup>¥£</sup></b>   | 1.8  | <b>56.2</b>               | 3.0  | <b>85.1</b>   | 5.7  | <b>56.4</b>   | 1.5  |
| Vitamin D (ug)  | <b>2.3<sup>¥£</sup></b>    | 0.2  | <b>2.7</b>                | 0.1  | <b>2.6</b>    | 0.1  | <b>2.6</b>    | 0.1  |
| Calcium (mg)    | <b>370.8<sup>¥£</sup></b>  | 11.7 | <b>439.8</b>              | 9.2  | <b>458.2</b>  | 8.5  | <b>428.1</b>  | 5.6  |
| Iron (mg)       | <b>6.7<sup>¥</sup></b>     | 0.1  | <b>6.9<sup>¥</sup></b>    | 0.1  | <b>6.3</b>    | 0.1  | <b>6.8</b>    | 0.01 |
| Magnesium (mg)  | <b>167.3</b>               | 3.1  | <b>177.7</b>              | 3.5  | <b>169.7</b>  | 2.9  | <b>172.9</b>  | 1.2  |
| Phosphorus (mg) | <b>696.2<sup>¥</sup></b>   | 12.4 | <b>704.8<sup>¥</sup></b>  | 8.2  | <b>652.0</b>  | 8.4  | <b>696.7</b>  | 4.7  |
| Potassium (mg)  | <b>1378.1<sup>¥£</sup></b> | 21.4 | <b>1536.7</b>             | 20.9 | <b>1611.8</b> | 26.2 | <b>1511.2</b> | 10.1 |
| Zinc (mg)       | <b>6.0<sup>¥</sup></b>     | 0.1  | <b>5.7<sup>¥</sup></b>    | 0.1  | <b>4.8</b>    | 0.1  | <b>5.6</b>    | 0.1  |
| Sodium (mg)     | <b>1621.9<sup>¥£</sup></b> | 27.5 | <b>1512.0<sup>¥</sup></b> | 19.6 | <b>1255.1</b> | 20.2 | <b>1478.9</b> | 11.0 |

\* Intake of macro- and micronutrients across quintiles of total sugars intake (as % energy) were compared using a general linear model (PROC SURVEYREG) including the following covariates: Model 1-misreporting status (determined using previously published methods by Garriguet [47]); Model 3- misreporting status plus age, sex, smoking, self-perceived health, blood pressure, diabetes, heart disease, cancer, osteoporosis, education, physical activity, income, BMI, immigrant status and weekend reference day. Note: Quintiles 2 and 4 are not presented for readability.

RAE, retinoic acid equivalent; DFE, dietary folate equivalents; SE, standard error.

**Supplemental Table S6.** Comparison of intakes from macro- and micronutrients by quintiles of total sugars intake (% energy) in Males Aged 19-30y\*

| <b>Males 19-30y (n=765)</b>          | <b>Q1</b>                |           | <b>Q3</b>               |           | <b>Q5</b>     |           |                  |
|--------------------------------------|--------------------------|-----------|-------------------------|-----------|---------------|-----------|------------------|
|                                      | <b>Mean</b>              | <b>SE</b> | <b>Mean</b>             | <b>SE</b> | <b>Mean</b>   | <b>SE</b> | <b>p-value**</b> |
| Energy (kcal)                        | <b>2379.9</b>            | 106.5     | <b>2608.3</b>           | 135.9     | <b>2338.3</b> | 121.7     | 0.028            |
| Carbohydrates (%)                    | <b>38.8<sup>¥£</sup></b> | 1.9       | <b>45.1<sup>¥</sup></b> | 1.8       | <b>58.2</b>   | 1.1       | <.0001           |
| Total Fibre (g/1000 kcal)            | <b>6.8</b>               | 0.4       | <b>7.5</b>              | 0.7       | <b>7.7</b>    | 0.9       | 0.108            |
| Total Sugars (%)                     | <b>7.9<sup>¥£</sup></b>  | 0.3       | <b>18.4<sup>¥</sup></b> | 0.2       | <b>32.3</b>   | 1.1       | <.0001           |
| Natural Sugars (%)                   | <b>4.3<sup>¥£</sup></b>  | 0.4       | <b>8.8</b>              | 0.8       | <b>12.1</b>   | 2.1       | <.0001           |
| Added Sugars (%)                     | <b>3.5<sup>¥£</sup></b>  | 0.3       | <b>9.6<sup>¥</sup></b>  | 0.9       | <b>20.2</b>   | 2.2       | <.0001           |
| Free Sugars (%)                      | <b>3.8<sup>¥£</sup></b>  | 0.3       | <b>11.2<sup>¥</sup></b> | 0.7       | <b>23.0</b>   | 2.1       | <.0001           |
| Fat (%)                              | <b>35.2<sup>¥</sup></b>  | 2.2       | <b>33.5<sup>¥</sup></b> | 1.1       | <b>26.4</b>   | 0.9       | <.0001           |
| Saturated Fat (%)                    | <b>11.2</b>              | 1.0       | <b>11.2</b>             | 1.1       | <b>10.0</b>   | 0.6       | 0.029            |
| Monounsaturated Fat (%)              | <b>13.4<sup>¥</sup></b>  | 0.8       | <b>12.4<sup>¥</sup></b> | 0.4       | <b>9.0</b>    | 0.5       | <.0001           |
| Polyunsaturated Fat (%)              | <b>7.5<sup>¥</sup></b>   | 0.3       | <b>6.5<sup>¥</sup></b>  | 0.9       | <b>4.8</b>    | 0.3       | <.0001           |
| Linoleic acid (%)                    | <b>6.5<sup>¥</sup></b>   | 0.2       | <b>5.7<sup>¥</sup></b>  | 0.6       | <b>4.1</b>    | 0.2       | <.0001           |
| Alpha-linonelic Acid (%)             | <b>0.8<sup>¥</sup></b>   | 0.1       | <b>0.7</b>              | 0.1       | <b>0.6</b>    | 0.0       | 0.003            |
| Protein (%)                          | <b>19.4<sup>¥</sup></b>  | 1.8       | <b>17.9<sup>¥</sup></b> | 0.7       | <b>14.5</b>   | 0.6       | <.0001           |
| Cholesterol (mg/1000 kcal)           | <b>192.8</b>             | 41.9      | <b>166.0</b>            | 15.6      | <b>107.6</b>  | 11.6      | 0.038            |
| Alcohol (%)                          | <b>6.6<sup>¥</sup></b>   | 2.1       | <b>3.6</b>              | 1.1       | <b>0.9</b>    | 0.6       | 0.008            |
| <b>micronutrients: per 1000 kcal</b> |                          |           |                         |           |               |           |                  |
| Vitamin A (ug RAE)                   | <b>323.8</b>             | 36.9      | <b>313.3</b>            | 49.7      | <b>289.5</b>  | 40.7      | 0.867            |
| Thiamin (mg)                         | <b>0.9</b>               | 0.1       | <b>0.7</b>              | 0.1       | <b>0.9</b>    | 0.0       | 0.375            |
| Riboflavin (mg)                      | <b>1.0</b>               | 0.0       | <b>1.1</b>              | 0.0       | <b>1.1</b>    | 0.1       | 0.399            |
| Niacin (mg)                          | <b>23.6</b>              | 2.0       | <b>22.6</b>             | 1.1       | <b>20.7</b>   | 1.1       | 0.513            |
| Vitamin B-6 (mg)                     | <b>0.9</b>               | 0.0       | <b>1.0</b>              | 0.1       | <b>1.1</b>    | 0.1       | 0.509            |

|                   |                           |       |                           |      |               |      |        |
|-------------------|---------------------------|-------|---------------------------|------|---------------|------|--------|
| Folate (ug DFE)   | <b>269.3</b>              | 19.9  | <b>230.5</b>              | 21.9 | <b>224.2</b>  | 16.4 | 0.281  |
| Vitamin B-12 (mg) | <b>2.0</b>                | 0.3   | <b>2.3</b>                | 0.2  | <b>2.0</b>    | 0.1  | 0.435  |
| Vitamin C (mg)    | <b>29.1<sup>¥£</sup></b>  | 4.2   | <b>48.8</b>               | 10.6 | <b>72.8</b>   | 10.1 | <.0001 |
| Vitamin D (ug)    | <b>1.7</b>                | 0.3   | <b>2.1</b>                | 0.5  | <b>2.6</b>    | 0.4  | 0.372  |
| Calcium (mg)      | <b>404.4</b>              | 25.6  | <b>437.3</b>              | 26.2 | <b>433.7</b>  | 43.8 | 0.976  |
| Iron (mg)         | <b>6.3</b>                | 0.3   | <b>6.3</b>                | 0.6  | <b>6.3</b>    | 0.4  | 0.977  |
| Magnesium (mg)    | <b>145.1</b>              | 6.1   | <b>152.1</b>              | 11.2 | <b>142.7</b>  | 13.0 | 0.558  |
| Phosphorus (mg)   | <b>686.1</b>              | 18.8  | <b>680.9</b>              | 26.0 | <b>624.8</b>  | 36.2 | 0.487  |
| Potassium (mg)    | <b>1209.2<sup>¥</sup></b> | 55.1  | <b>1293.2</b>             | 83.1 | <b>1368.3</b> | 77.9 | 0.004  |
| Zinc (mg)         | <b>5.5</b>                | 0.5   | <b>5.7</b>                | 0.5  | <b>4.7</b>    | 0.4  | 0.026  |
| Sodium (mg)       | <b>1797.3<sup>¥</sup></b> | 144.9 | <b>1485.3<sup>¥</sup></b> | 76.9 | <b>1280.0</b> | 68.8 | 0.001  |

\* Intake of macro- and micronutrients across quintiles of total sugars intake (as % energy) were compared using a general linear model (PROC SURVEYREG) including the following covariates: Model 3, mis-reporting status (determined using previously published methods by Garriguet [47]), age, smoking, self-perceived health, blood pressure, diabetes, heart disease, cancer, osteoporosis, education, physical activity, income, BMI, immigrant status and weekend reference day. Note: Quintiles 2 and 4 are not presented for readability.

\*\* The p-value represents the global p-value for a significant difference across quintiles of intake of total sugars (%E)

¥ significant difference compared to Q5 in post-hoc comparison with Bonferroni adjustment based in Model 3 (p<0.05)

£ significant difference compared to Q3 in post-hoc comparison with Bonferroni adjustment in Model 3 (p<0.05)

BMI, body mass index; DFE, dietary folate equivalents; y, years



**Supplemental Table S7.** Comparison of intakes from macro- and micronutrients by quintiles of total sugars intake (% energy) in Females Aged 19-30y\*

| Females 19-30y (n=757)               | Q1                       |       | Q3                       |      | Q5            |      | p-value** |
|--------------------------------------|--------------------------|-------|--------------------------|------|---------------|------|-----------|
|                                      | Mean                     | SE    | Mean                     | SE   | Mean          | SE   |           |
| Energy (kcal)                        | <b>1650.9</b>            | 130.5 | <b>1694.9</b>            | 67.0 | <b>1676.8</b> | 56.4 | 0.630     |
| Carbohydrates (%)                    | <b>37.6<sup>¥£</sup></b> | 2.2   | <b>47.3<sup>¥</sup></b>  | 1.4  | <b>60.0</b>   | 1.6  | <.0001    |
| Total Fibre (g/1000 kcal)            | <b>8.5</b>               | 1.4   | <b>9.9</b>               | 0.7  | <b>9.3</b>    | 0.7  | 0.461     |
| Total Sugars (%)                     | <b>7.6<sup>¥£</sup></b>  | 0.6   | <b>18.5<sup>¥</sup></b>  | 0.2  | <b>33.8</b>   | 1.1  | <.0001    |
| Natural Sugars (%)                   | <b>5.6<sup>¥</sup></b>   | 1.5   | <b>9.9<sup>¥</sup></b>   | 1.1  | <b>16.4</b>   | 1.6  | <.0001    |
| Added Sugars (%)                     | <b>2.0<sup>¥£</sup></b>  | 1.0   | <b>8.6<sup>¥</sup></b>   | 1.1  | <b>17.3</b>   | 1.3  | <.0001    |
| Free Sugars (%)                      | <b>2.1<sup>¥£</sup></b>  | 1.1   | <b>10.0<sup>¥</sup></b>  | 0.9  | <b>21.1</b>   | 1.7  | <.0001    |
| Fat (%)                              | <b>34.6<sup>¥</sup></b>  | 2.3   | <b>33.0<sup>¥</sup></b>  | 1.4  | <b>25.6</b>   | 1.4  | <.0001    |
| Saturated Fat (%)                    | <b>11.2</b>              | 1.3   | <b>10.5</b>              | 0.5  | <b>8.9</b>    | 0.6  | 0.004     |
| Monounsaturated Fat (%)              | <b>13.3<sup>¥</sup></b>  | 0.9   | <b>12.4<sup>¥</sup></b>  | 0.7  | <b>9.1</b>    | 0.4  | <.0001    |
| Polyunsaturated Fat (%)              | <b>6.9</b>               | 0.5   | <b>7.0<sup>¥</sup></b>   | 0.7  | <b>5.2</b>    | 0.5  | <.0001    |
| Linoleic acid (%)                    | <b>5.9</b>               | 0.4   | <b>5.9<sup>¥</sup></b>   | 0.4  | <b>4.4</b>    | 0.4  | <.0001    |
| Alpha-linonelic Acid (%)             | <b>0.7</b>               | 0.1   | <b>0.7</b>               | 0.1  | <b>0.6</b>    | 0.1  | 0.059     |
| Protein (%)                          | <b>18.9<sup>¥</sup></b>  | 1.9   | <b>18.4<sup>¥</sup></b>  | 1.0  | <b>13.7</b>   | 0.6  | <.0001    |
| Cholesterol (mg/1000 kcal)           | <b>164.3<sup>¥</sup></b> | 15.5  | <b>166.0<sup>¥</sup></b> | 15.8 | <b>96.9</b>   | 9.6  | <.0001    |
| Alcohol (%)                          | <b>8.9</b>               | 3.7   | <b>1.3</b>               | 0.5  | <b>0.6</b>    | 0.5  | 0.244     |
| <b>micronutrients: per 1000 kcal</b> |                          |       |                          |      |               |      |           |
| Vitamin A (ug RAE)                   | <b>449.3</b>             | 170.5 | <b>316.3</b>             | 64.4 | <b>412.0</b>  | 51.6 | 0.571     |
| Thiamin (mg)                         | <b>0.9</b>               | 0.1   | <b>0.9</b>               | 0.1  | <b>0.8</b>    | 0.0  | 0.337     |
| Riboflavin (mg)                      | <b>1.1</b>               | 0.1   | <b>1.1</b>               | 0.0  | <b>1.1</b>    | 0.1  | 0.562     |
| Niacin (mg)                          | <b>23.8<sup>¥</sup></b>  | 2.3   | <b>23.7<sup>¥</sup></b>  | 1.3  | <b>17.3</b>   | 1.2  | <.0001    |
| Vitamin B-6 (mg)                     | <b>0.9</b>               | 0.1   | <b>1.0</b>               | 0.1  | <b>1.0</b>    | 0.1  | 0.140     |

|                   |               |       |               |       |               |      |        |
|-------------------|---------------|-------|---------------|-------|---------------|------|--------|
| Folate (ug DFE)   | <b>287.7</b>  | 44.1  | <b>255.5</b>  | 13.8  | <b>219.1</b>  | 13.6 | 0.090  |
| Vitamin B-12 (mg) | <b>2.8</b>    | 0.4   | <b>1.9</b>    | 0.3   | <b>2.1</b>    | 0.3  | 0.739  |
| Vitamin C (mg)    | <b>43.7</b>   | 16.4  | <b>58.0</b>   | 9.2   | <b>81.7</b>   | 8.9  | 0.011  |
| Vitamin D (ug)    | <b>2.3</b>    | 0.8   | <b>2.7</b>    | 0.9   | <b>2.5</b>    | 0.4  | 0.408  |
| Calcium (mg)      | <b>420.2</b>  | 62.9  | <b>475.7</b>  | 32.4  | <b>496.7</b>  | 24.8 | 0.022  |
| Iron (mg)         | <b>6.7</b>    | 0.4   | <b>6.3</b>    | 0.5   | <b>6.3</b>    | 0.3  | 0.444  |
| Magnesium (mg)    | <b>167.3</b>  | 22.8  | <b>163.7</b>  | 7.0   | <b>168.5</b>  | 8.1  | 0.656  |
| Phosphorus (mg)   | <b>678.0</b>  | 23.2  | <b>703.6</b>  | 27.9  | <b>659.0</b>  | 29.3 | 0.831  |
| Potassium (mg)    | <b>1420.4</b> | 135.2 | <b>1495.1</b> | 71.1  | <b>1593.9</b> | 75.8 | 0.122  |
| Zinc (mg)         | <b>6.5</b>    | 0.8   | <b>4.7</b>    | 0.3   | <b>4.9</b>    | 0.3  | <.0001 |
| Sodium (mg)       | <b>1585.4</b> | 120.2 | <b>1393.2</b> | 107.8 | <b>1258.7</b> | 65.2 | 0.029  |

\* Intake of macro- and micronutrients across quintiles of total sugars intake (as % energy) were compared using a general linear model (PROC SURVEYREG) including the following covariates: Model 3, mis-reporting status (determined using previously published methods by Garriguet [47]), age, smoking, self-perceived health, blood pressure, diabetes, heart disease, cancer, osteoporosis, education, physical activity, income, BMI, immigrant status and weekend reference day. Note: Quintiles 2 and 4 are not presented for readability.

\*\* The p-value represents the global p-value for a significant difference across quintiles of intake of total sugars (%E)

¥ significant difference compared to Q5 in post-hoc comparison with Bonferroni adjustment in Model 3 (p<0.05)

£ significant difference compared to Q3 in post-hoc comparison with Bonferroni adjustment in Model 3 (p<0.05)

BMI, body mass index; DFE, dietary folate equivalents; y, years

**Supplemental Table S8.** Comparison of intakes from macro- and micronutrients by quintiles of total sugars intake (% energy) in Males Aged 31-50y\*

| <b>Males 31-50y (n=1839)</b>         | <b>Q1</b>                |           | <b>Q3</b>                |           | <b>Q5</b>     |           |                  |
|--------------------------------------|--------------------------|-----------|--------------------------|-----------|---------------|-----------|------------------|
|                                      | <b>Mean</b>              | <b>SE</b> | <b>Mean</b>              | <b>SE</b> | <b>Mean</b>   | <b>SE</b> | <b>p-value**</b> |
| Energy (kcal)                        | <b>2316.8</b>            | 56.3      | <b>2313.9</b>            | 67.4      | <b>2131.7</b> | 128.2     | 0.028            |
| Carbohydrates (%)                    | <b>38.4<sup>¥£</sup></b> | 1.2       | <b>48.3<sup>¥</sup></b>  | 0.9       | <b>58.7</b>   | 0.9       | <.0001           |
| Total Fibre (g/1000 kcal)            | <b>8.2</b>               | 0.5       | <b>9.2</b>               | 0.5       | <b>9.0</b>    | 0.7       | 0.043            |
| Total Sugars (%)                     | <b>7.7<sup>¥£</sup></b>  | 0.3       | <b>18.3<sup>¥</sup></b>  | 0.1       | <b>34.6</b>   | 0.9       | <.0001           |
| Natural Sugars (%)                   | <b>4.6<sup>¥£</sup></b>  | 0.2       | <b>9.7</b>               | 0.7       | <b>13.3</b>   | 1.1       | <.0001           |
| Added Sugars (%)                     | <b>3.0<sup>¥£</sup></b>  | 0.2       | <b>8.6<sup>¥</sup></b>   | 0.7       | <b>21.0</b>   | 1.3       | <.0001           |
| Free Sugars (%)                      | <b>3.3<sup>¥£</sup></b>  | 0.3       | <b>9.7<sup>¥</sup></b>   | 0.7       | <b>23.4</b>   | 1.2       | <.0001           |
| Fat (%)                              | <b>35.9<sup>¥</sup></b>  | 1.0       | <b>32.1<sup>¥</sup></b>  | 1.0       | <b>26.6</b>   | 0.8       | <.0001           |
| Saturated Fat (%)                    | <b>10.9<sup>¥</sup></b>  | 0.3       | <b>10.7</b>              | 0.6       | <b>8.7</b>    | 0.8       | 0.020            |
| Monounsaturated Fat (%)              | <b>14.2<sup>¥£</sup></b> | 0.6       | <b>12.1<sup>¥</sup></b>  | 0.5       | <b>9.9</b>    | 0.4       | <.0001           |
| Polyunsaturated Fat (%)              | <b>7.6<sup>¥</sup></b>   | 0.3       | <b>6.4</b>               | 0.2       | <b>5.5</b>    | 0.3       | <.0001           |
| Linoleic acid (%)                    | <b>6.5<sup>¥</sup></b>   | 0.3       | <b>5.4</b>               | 0.2       | <b>4.8</b>    | 0.2       | <.0001           |
| Alpha-linonelic Acid (%)             | <b>0.7<sup>¥</sup></b>   | 0.0       | <b>0.7<sup>¥</sup></b>   | 0.0       | <b>0.6</b>    | 0.0       | 0.006            |
| Protein (%)                          | <b>19.2<sup>¥</sup></b>  | 0.6       | <b>17.3<sup>¥</sup></b>  | 0.5       | <b>13.1</b>   | 0.6       | <.0001           |
| Cholesterol (mg/1000 kcal)           | <b>180.4<sup>¥</sup></b> | 22.3      | <b>145.1</b>             | 7.8       | <b>108.4</b>  | 8.3       | <.0001           |
| Alcohol (%)                          | <b>6.4<sup>¥£</sup></b>  | 0.7       | <b>2.3</b>               | 0.5       | <b>1.7</b>    | 0.6       | <.0001           |
| <b>micronutrients: per 1000 kcal</b> |                          |           |                          |           |               |           |                  |
| Vitamin A (ug RAE)                   | <b>346.8</b>             | 35.3      | <b>300.3</b>             | 14.4      | <b>282.6</b>  | 23.8      | 0.268            |
| Thiamin (mg)                         | <b>0.9</b>               | 0.0       | <b>0.8</b>               | 0.0       | <b>0.8</b>    | 0.1       | 0.538            |
| Riboflavin (mg)                      | <b>1.0</b>               | 0.1       | <b>1.0</b>               | 0.0       | <b>1.0</b>    | 0.1       | 0.278            |
| Niacin (mg)                          | <b>24.6<sup>¥</sup></b>  | 0.7       | <b>21.3<sup>¥</sup></b>  | 1.0       | <b>16.8</b>   | 0.4       | <.0001           |
| Vitamin B-6 (mg)                     | <b>1.0<sup>¥</sup></b>   | 0.0       | <b>0.9</b>               | 0.1       | <b>0.8</b>    | 0.0       | <0.001           |
| Folate (ug DFE)                      | <b>246.9</b>             | 12.0      | <b>233.0<sup>¥</sup></b> | 12.2      | <b>201.5</b>  | 10.6      | 0.006            |

|                   |                           |      |                           |      |               |      |       |
|-------------------|---------------------------|------|---------------------------|------|---------------|------|-------|
| Vitamin B-12 (mg) | <b>2.6</b>                | 0.4  | <b>2.3</b>                | 0.5  | <b>1.7</b>    | 0.2  | 0.524 |
| Vitamin C (mg)    | <b>37.6</b>               | 7.6  | <b>48.0</b>               | 3.6  | <b>74.4</b>   | 13.9 | 0.001 |
| Vitamin D (ug)    | <b>2.2</b>                | 0.8  | <b>2.3</b>                | 0.3  | <b>2.2</b>    | 0.3  | 0.189 |
| Calcium (mg)      | <b>369.9</b>              | 22.6 | <b>400.9</b>              | 20.6 | <b>397.1</b>  | 57.3 | 0.100 |
| Iron (mg)         | <b>6.6</b>                | 0.3  | <b>6.7</b>                | 0.2  | <b>5.9</b>    | 0.3  | 0.047 |
| Magnesium (mg)    | <b>165.7</b>              | 5.2  | <b>166.6</b>              | 4.8  | <b>151.3</b>  | 6.6  | 0.010 |
| Phosphorus (mg)   | <b>686.5</b>              | 21.5 | <b>675.1</b>              | 21.4 | <b>597.6</b>  | 34.0 | 0.153 |
| Potassium (mg)    | <b>1358.1</b>             | 39.0 | <b>1422.0</b>             | 34.9 | <b>1465.7</b> | 67.4 | 0.293 |
| Zinc (mg)         | <b>6.2</b>                | 0.4  | <b>5.6<sup>¥</sup></b>    | 0.2  | <b>4.6</b>    | 0.2  | 0.022 |
| Sodium (mg)       | <b>1519.5<sup>¥</sup></b> | 46.8 | <b>1502.0<sup>£</sup></b> | 55.6 | <b>1241.7</b> | 55.5 | 0.002 |

\* Intake of macro- and micronutrients across quintiles of total sugars intake (as % energy) were compared using a general linear model (PROC SURVEYREG) including the following covariates: Model 3, mis-reporting status (determined using previously published methods by Garriguet [47]), age, smoking, self-perceived health, blood pressure, diabetes, heart disease, cancer, osteoporosis, education, physical activity, income, BMI, immigrant status and weekend reference day. Note: Quintiles 2 and 4 are not presented for readability.

\*\* The p-value represents the global p-value for a significant difference across quintiles of intake of total sugars (%E)

¥ significant difference compared to Q5 in post-hoc comparison with Bonferroni adjustment in Model 3 (p<0.05)

£ significant difference compared to Q3 in post-hoc comparison with Bonferroni adjustment in Model 3 (p<0.05)

BMI, body mass index; DFE, dietary folate equivalents; y, years

**Supplemental Table S9.** Comparison of intakes from macro- and micronutrients by quintiles of total sugars intake (% energy) in Females Aged 31-50y\*

| <b>Females 31-50y (n=1945)</b>       | <b>Q1</b>                |           | <b>Q3</b>               |           | <b>Q5</b>     |           | <b>p-value**</b> |
|--------------------------------------|--------------------------|-----------|-------------------------|-----------|---------------|-----------|------------------|
|                                      | <b>Mean</b>              | <b>SE</b> | <b>Mean</b>             | <b>SE</b> | <b>Mean</b>   | <b>SE</b> |                  |
| Energy (kcal)                        | <b>1673.9</b>            | 38.2      | <b>1684.2</b>           | 41.6      | <b>1618.8</b> | 27.8      | 0.592            |
| Carbohydrates (%)                    | <b>40.0<sup>¥£</sup></b> | 1.8       | <b>48.4<sup>¥</sup></b> | 1.6       | <b>57.6</b>   | 1.0       | <.0001           |
| Total Fibre (g/1000 kcal)            | <b>9.4</b>               | 0.5       | <b>10.7</b>             | 1.0       | <b>11.1</b>   | 0.7       | 0.247            |
| Total Sugars (%)                     | <b>8.1<sup>¥£</sup></b>  | 0.3       | <b>18.3<sup>¥</sup></b> | 0.1       | <b>32.6</b>   | 0.6       | <.0001           |
| Natural Sugars (%)                   | <b>4.8<sup>¥£</sup></b>  | 0.2       | <b>10.3<sup>¥</sup></b> | 0.5       | <b>16.1</b>   | 0.7       | <.0001           |
| Added Sugars (%)                     | <b>3.2<sup>¥£</sup></b>  | 0.2       | <b>7.8<sup>¥</sup></b>  | 0.4       | <b>16.5</b>   | 0.9       | <.0001           |
| Free Sugars (%)                      | <b>3.6<sup>¥£</sup></b>  | 0.4       | <b>8.8<sup>¥</sup></b>  | 0.4       | <b>19.1</b>   | 0.9       | <.0001           |
| Fat (%)                              | <b>37.4<sup>¥£</sup></b> | 1.6       | <b>32.4<sup>¥</sup></b> | 1.4       | <b>26.8</b>   | 0.9       | <.0001           |
| Saturated Fat (%)                    | <b>12.1<sup>¥</sup></b>  | 1.0       | <b>10.4<sup>¥</sup></b> | 0.5       | <b>9.1</b>    | 0.3       | <.0001           |
| Monounsaturated Fat (%)              | <b>14.0<sup>¥£</sup></b> | 0.7       | <b>12.0<sup>¥</sup></b> | 0.5       | <b>9.5</b>    | 0.3       | <.0001           |
| Polyunsaturated Fat (%)              | <b>7.8<sup>¥</sup></b>   | 0.3       | <b>7.1<sup>¥</sup></b>  | 0.3       | <b>5.7</b>    | 0.3       | <.0001           |
| Linoleic acid (%)                    | <b>6.7<sup>¥</sup></b>   | 0.3       | <b>5.8<sup>¥</sup></b>  | 0.2       | <b>4.9</b>    | 0.3       | <.0001           |
| Alpha-linonelic Acid (%)             | <b>0.8</b>               | 0.1       | <b>0.8</b>              | 0.0       | <b>0.6</b>    | 0.0       | 0.003            |
| Protein (%)                          | <b>18.1</b>              | 0.8       | <b>17.3<sup>¥</sup></b> | 0.4       | <b>15.0</b>   | 0.6       | <0.001           |
| Cholesterol (mg/1000 kcal)           | <b>169.5</b>             | 15.2      | <b>154.8</b>            | 24.4      | <b>120.1</b>  | 11.4      | 0.002            |
| Alcohol (%)                          | <b>4.5<sup>¥</sup></b>   | 0.8       | <b>1.8</b>              | 0.4       | <b>0.6</b>    | 0.2       | 0.001            |
| <b>micronutrients: per 1000 kcal</b> |                          |           |                         |           |               |           |                  |
| Vitamin A (ug RAE)                   | <b>309.3</b>             | 24.1      | <b>390.9</b>            | 34.1      | <b>431.8</b>  | 64.3      | 0.103            |
| Thiamin (mg)                         | <b>0.9</b>               | 0.0       | <b>0.9</b>              | 0.1       | <b>0.8</b>    | 0.0       | 0.062            |
| Riboflavin (mg)                      | <b>1.0<sup>£</sup></b>   | 0.0       | <b>1.1</b>              | 0.0       | <b>1.1</b>    | 0.0       | 0.027            |
| Niacin (mg)                          | <b>23.1</b>              | 1.3       | <b>20.9</b>             | 1.2       | <b>19.4</b>   | 1.0       | <.0001           |

|                   |                            |      |                           |      |               |       |        |
|-------------------|----------------------------|------|---------------------------|------|---------------|-------|--------|
| Vitamin B-6 (mg)  | <b>0.9</b>                 | 0.1  | <b>0.9</b>                | 0.0  | <b>1.0</b>    | 0.1   | 0.629  |
| Folate (ug DFE)   | <b>255.0</b>               | 15.4 | <b>262.7</b>              | 14.8 | <b>248.8</b>  | 14.6  | 0.417  |
| Vitamin B-12 (mg) | <b>1.9</b>                 | 0.2  | <b>2.8</b>                | 0.6  | <b>1.9</b>    | 0.2   | 0.017  |
| Vitamin C (mg)    | <b>38.2<sup>¥</sup></b>    | 3.8  | <b>59.9</b>               | 4.6  | <b>97.3</b>   | 20.0  | <.0001 |
| Vitamin D (ug)    | <b>2.5</b>                 | 0.4  | <b>2.8</b>                | 0.3  | <b>2.2</b>    | 0.2   | 0.107  |
| Calcium (mg)      | <b>376.2<sup>£</sup></b>   | 17.0 | <b>499.4</b>              | 43.0 | <b>451.7</b>  | 20.5  | <.0001 |
| Iron (mg)         | <b>6.8</b>                 | 0.2  | <b>7.4<sup>¥</sup></b>    | 0.3  | <b>6.3</b>    | 0.2   | 0.005  |
| Magnesium (mg)    | <b>167.7</b>               | 6.7  | <b>195.7</b>              | 9.9  | <b>177.7</b>  | 10.0  | 0.247  |
| Phosphorus (mg)   | <b>725.5</b>               | 29.1 | <b>727.2</b>              | 23.8 | <b>651.2</b>  | 22.9  | 0.045  |
| Potassium (mg)    | <b>1319.4<sup>¥£</sup></b> | 35.7 | <b>1565.9</b>             | 45.0 | <b>1664.7</b> | 101.4 | <.0001 |
| Zinc (mg)         | <b>5.6<sup>¥</sup></b>     | 0.2  | <b>5.8<sup>¥</sup></b>    | 0.2  | <b>4.8</b>    | 0.2   | 0.001  |
| Sodium (mg)       | <b>1666.0<sup>¥</sup></b>  | 78.9 | <b>1558.5<sup>¥</sup></b> | 70.4 | <b>1276.4</b> | 57.8  | <0.001 |

\* Intake of macro- and micronutrients across quintiles of total sugars intake (as % energy) were compared using a general linear model (PROC SURVEYREG) including the following covariates: Model 3, mis-reporting status (determined using previously published methods by Garriguet [47]), age, smoking, self-perceived health, blood pressure, diabetes, heart disease, cancer, osteoporosis, education, physical activity, income, BMI, immigrant status and weekend reference day. Note: Quintiles 2 and 4 are not presented for readability.

\*\* The p-value represents the global p-value for a significant difference across quintiles of intake of total sugars (%E)

¥ significant difference compared to Q5 in post-hoc comparison with Bonferroni adjustment in Model 3 (p<0.05)

£ significant difference compared to Q3 in post-hoc comparison with Bonferroni adjustment in Model 3 (p<0.05)

BMI, body mass index; DFE, dietary folate equivalents; y, years

**Supplemental Table S10.** Comparison of intakes from macro- and micronutrients by quintiles of total sugars intake (% energy) in Males Aged 51-70y\*

| <b>Males 51-70y (n=1961)</b>         | <b>Q1</b>                |           | <b>Q3</b>               |           | <b>Q5</b>     |           | <b>p-value**</b> |
|--------------------------------------|--------------------------|-----------|-------------------------|-----------|---------------|-----------|------------------|
|                                      | <b>Mean</b>              | <b>SE</b> | <b>Mean</b>             | <b>SE</b> | <b>Mean</b>   | <b>SE</b> |                  |
| Energy (kcal)                        | <b>1993.6</b>            | 34.8      | <b>2140.7</b>           | 62.5      | <b>2063.3</b> | 57.9      | 0.127            |
| Carbohydrates (%)                    | <b>38.4<sup>¥£</sup></b> | 1.3       | <b>46.7<sup>¥</sup></b> | 1.4       | <b>57.8</b>   | 0.8       | <.0001           |
| Total Fibre (g/1000 kcal)            | <b>8.2<sup>¥</sup></b>   | 0.3       | <b>9.3</b>              | 1.1       | <b>9.7</b>    | 0.5       | <.0001           |
| Total Sugars (%)                     | <b>7.7<sup>¥£</sup></b>  | 0.2       | <b>18.5<sup>¥</sup></b> | 0.2       | <b>33.0</b>   | 0.6       | <.0001           |
| Natural Sugars (%)                   | <b>4.9<sup>¥£</sup></b>  | 0.3       | <b>10.0<sup>¥</sup></b> | 0.5       | <b>15.1</b>   | 0.9       | <.0001           |
| Added Sugars (%)                     | <b>2.7<sup>¥£</sup></b>  | 0.2       | <b>8.3<sup>¥</sup></b>  | 0.6       | <b>17.9</b>   | 1.1       | <.0001           |
| Free Sugars (%)                      | <b>3.1<sup>¥£</sup></b>  | 0.2       | <b>9.3<sup>¥</sup></b>  | 0.6       | <b>20.5</b>   | 0.8       | <.0001           |
| Fat (%)                              | <b>35.9<sup>¥£</sup></b> | 1.4       | <b>32.7<sup>¥</sup></b> | 0.9       | <b>27.6</b>   | 1.3       | <.0001           |
| Saturated Fat (%)                    | <b>10.8</b>              | 0.5       | <b>10.6</b>             | 0.3       | <b>9.5</b>    | 0.6       | 0.101            |
| Monounsaturated Fat (%)              | <b>13.7<sup>¥£</sup></b> | 0.5       | <b>12.1<sup>¥</sup></b> | 0.4       | <b>9.8</b>    | 0.6       | <.0001           |
| Polyunsaturated Fat (%)              | <b>8.2<sup>¥</sup></b>   | 0.4       | <b>7.1<sup>¥</sup></b>  | 0.3       | <b>5.7</b>    | 0.4       | <.0001           |
| Linoleic acid (%)                    | <b>7.0<sup>¥</sup></b>   | 0.4       | <b>6.0<sup>¥</sup></b>  | 0.3       | <b>4.8</b>    | 0.3       | <.0001           |
| Alpha-linonelic Acid (%)             | <b>0.9</b>               | 0.1       | <b>0.8</b>              | 0.1       | <b>0.7</b>    | 0.1       | 0.025            |
| Protein (%)                          | <b>18.9<sup>¥</sup></b>  | 0.7       | <b>18.0<sup>¥</sup></b> | 0.8       | <b>13.4</b>   | 1.3       | <.0001           |
| Cholesterol (mg/1000 kcal)           | <b>188.8<sup>¥</sup></b> | 13.1      | <b>174.3</b>            | 15.0      | <b>112.2</b>  | 24.3      | 0.003            |
| Alcohol (%)                          | <b>6.8<sup>¥</sup></b>   | 0.9       | <b>2.7<sup>¥</sup></b>  | 0.3       | <b>1.2</b>    | 0.3       | <.0001           |
| <b>micronutrients: per 1000 kcal</b> |                          |           |                         |           |               |           |                  |
| Vitamin A (ug RAE)                   | <b>336.7</b>             | 31.5      | <b>350.4</b>            | 25.1      | <b>386.5</b>  | 38.4      | 0.032            |
| Thiamin (mg)                         | <b>0.8</b>               | 0.1       | <b>0.8</b>              | 0.0       | <b>0.8</b>    | 0.1       | 0.593            |
| Riboflavin (mg)                      | <b>1.0</b>               | 0.0       | <b>1.1</b>              | 0.0       | <b>1.1</b>    | 0.0       | 0.374            |
| Niacin (mg)                          | <b>24.0<sup>¥</sup></b>  | 0.8       | <b>22.1<sup>¥</sup></b> | 0.8       | <b>17.7</b>   | 0.7       | <.0001           |

|                   |                            |      |                         |      |               |      |        |
|-------------------|----------------------------|------|-------------------------|------|---------------|------|--------|
| Vitamin B-6 (mg)  | <b>0.9</b>                 | 0.0  | <b>1.0</b>              | 0.0  | <b>0.8</b>    | 0.1  | 0.040  |
| Folate (ug DFE)   | <b>235.0</b>               | 13.0 | <b>227.5</b>            | 8.0  | <b>215.9</b>  | 10.7 | 0.739  |
| Vitamin B-12 (mg) | <b>2.5</b>                 | 0.2  | <b>2.4</b>              | 0.2  | <b>1.9</b>    | 0.3  | 0.451  |
| Vitamin C (mg)    | <b>34.0<sup>¥£</sup></b>   | 2.8  | <b>45.1<sup>¥</sup></b> | 8.2  | <b>83.6</b>   | 5.8  | <.0001 |
| Vitamin D (ug)    | <b>2.6</b>                 | 0.3  | <b>3.2</b>              | 0.4  | <b>3.0</b>    | 0.4  | 0.142  |
| Calcium (mg)      | <b>338.3<sup>¥£</sup></b>  | 17.7 | <b>405.8</b>            | 15.2 | <b>450.3</b>  | 26.5 | <.0001 |
| Iron (mg)         | <b>6.6</b>                 | 0.2  | <b>6.7</b>              | 0.1  | <b>6.2</b>    | 0.3  | 0.018  |
| Magnesium (mg)    | <b>168.2</b>               | 5.8  | <b>166.7</b>            | 13.8 | <b>172.6</b>  | 8.5  | 0.171  |
| Phosphorus (mg)   | <b>668.1</b>               | 13.9 | <b>704.3</b>            | 14.1 | <b>679.8</b>  | 28.6 | 0.071  |
| Potassium (mg)    | <b>1403.9<sup>¥£</sup></b> | 30.3 | <b>1536.4</b>           | 34.2 | <b>1592.7</b> | 66.8 | 0.004  |
| Zinc (mg)         | <b>6.2<sup>¥</sup></b>     | 0.2  | <b>5.9<sup>¥</sup></b>  | 0.2  | <b>4.6</b>    | 0.4  | <.0001 |
| Sodium (mg)       | <b>1619.8<sup>¥</sup></b>  | 59.0 | <b>1504.1</b>           | 46.9 | <b>1277.7</b> | 68.4 | 0.010  |

\* Intake of macro- and micronutrients across quintiles of total sugars intake (as % energy) were compared using a general linear model (PROC SURVEYREG) including the following covariates: Model 3, mis-reporting status (determined using previously published methods by Garriguet [47]), age, smoking, self-perceived health, blood pressure, diabetes, heart disease, cancer, osteoporosis, education, physical activity, income, BMI, immigrant status and weekend reference day. Note: Quintiles 2 and 4 are not presented for readability.

\*\* The p-value represents the global p-value for a significant difference across quintiles of intake of total sugars (%E)

<sup>¥</sup> significant difference compared to Q5 in post-hoc comparison with Bonferroni adjustment in Model 3 (p<0.05)

<sup>£</sup> significant difference compared to Q3 in post-hoc comparison with Bonferroni adjustment in Model 3 (p<0.05)

BMI, body mass index; DFE, dietary folate equivalents; y, years



**Supplemental Table S11.** Comparison of intakes from macro- and micronutrients by quintiles of total sugars intake (% energy) in Females Aged 51-70y\*

| <b>Females 51-70y (n=2105)</b>       | <b>Q1</b>                |           | <b>Q3</b>                |           | <b>Q5</b>     |           |                  |
|--------------------------------------|--------------------------|-----------|--------------------------|-----------|---------------|-----------|------------------|
|                                      | <b>Mean</b>              | <b>SE</b> | <b>Mean</b>              | <b>SE</b> | <b>Mean</b>   | <b>SE</b> | <b>p-value**</b> |
| Energy (kcal)                        | <b>1614.0</b>            | 35.3      | <b>1567.6</b>            | 31.4      | <b>1626.4</b> | 101.2     | 0.531            |
| Carbohydrates (%)                    | <b>38.7<sup>¥£</sup></b> | 1.1       | <b>48.5<sup>¥</sup></b>  | 0.7       | <b>57.8</b>   | 1.3       | <.0001           |
| Total Fibre (g/1000 kcal)            | <b>9.5</b>               | 0.4       | <b>12.5</b>              | 1.0       | <b>11.1</b>   | 0.8       | <.0001           |
| Total Sugars (%)                     | <b>7.9<sup>¥£</sup></b>  | 0.2       | <b>18.3<sup>¥</sup></b>  | 0.1       | <b>32.3</b>   | 0.6       | <.0001           |
| Natural Sugars (%)                   | <b>5.0<sup>¥£</sup></b>  | 0.3       | <b>11.2<sup>¥</sup></b>  | 0.4       | <b>16.4</b>   | 1.1       | <.0001           |
| Added Sugars (%)                     | <b>2.9<sup>¥£</sup></b>  | 0.2       | <b>7.0<sup>¥</sup></b>   | 0.3       | <b>15.8</b>   | 0.9       | <.0001           |
| Free Sugars (%)                      | <b>3.0<sup>¥£</sup></b>  | 0.2       | <b>7.7<sup>¥</sup></b>   | 0.3       | <b>18.4</b>   | 0.9       | <.0001           |
| Fat (%)                              | <b>36.9<sup>¥£</sup></b> | 0.9       | <b>30.2<sup>¥</sup></b>  | 1.0       | <b>25.8</b>   | 0.8       | <.0001           |
| Saturated Fat (%)                    | <b>11.6<sup>¥£</sup></b> | 0.4       | <b>9.5</b>               | 0.5       | <b>8.7</b>    | 0.3       | <.0001           |
| Monounsaturated Fat (%)              | <b>14.0<sup>¥£</sup></b> | 0.4       | <b>11.4<sup>¥</sup></b>  | 0.3       | <b>9.0</b>    | 0.3       | <.0001           |
| Polyunsaturated Fat (%)              | <b>8.2<sup>¥</sup></b>   | 0.4       | <b>6.7</b>               | 0.3       | <b>5.5</b>    | 0.3       | <.0001           |
| Linoleic acid (%)                    | <b>6.8<sup>¥</sup></b>   | 0.3       | <b>5.6</b>               | 0.2       | <b>4.7</b>    | 0.3       | <.0001           |
| Alpha-linonelic Acid (%)             | <b>1.0<sup>¥</sup></b>   | 0.1       | <b>0.8</b>               | 0.1       | <b>0.7</b>    | 0.0       | <0.001           |
| Protein (%)                          | <b>18.6<sup>¥</sup></b>  | 0.6       | <b>17.8<sup>¥</sup></b>  | 0.7       | <b>14.2</b>   | 0.3       | <.0001           |
| Cholesterol (mg/1000 kcal)           | <b>167.0<sup>¥</sup></b> | 9.3       | <b>138.6<sup>¥</sup></b> | 9.1       | <b>103.0</b>  | 5.9       | <.0001           |
| Alcohol (%)                          | <b>5.8<sup>¥</sup></b>   | 0.9       | <b>3.5</b>               | 1.0       | <b>2.2</b>    | 0.8       | 0.001            |
| <b>micronutrients: per 1000 kcal</b> |                          |           |                          |           |               |           |                  |
| Vitamin A (ug RAE)                   | <b>331.4</b>             | 22.3      | <b>470.9</b>             | 41.5      | <b>381.9</b>  | 19.4      | 0.054            |
| Thiamin (mg)                         | <b>0.8</b>               | 0.1       | <b>0.9</b>               | 0.1       | <b>0.8</b>    | 0.0       | 0.110            |
| Riboflavin (mg)                      | <b>1.0</b>               | 0.0       | <b>1.1</b>               | 0.0       | <b>1.1</b>    | 0.1       | 0.075            |
| Niacin (mg)                          | <b>23.3<sup>¥</sup></b>  | 0.9       | <b>22.4<sup>¥</sup></b>  | 0.9       | <b>18.0</b>   | 0.5       | <.0001           |

|                   |                            |      |                            |      |               |       |        |
|-------------------|----------------------------|------|----------------------------|------|---------------|-------|--------|
| Vitamin B-6 (mg)  | <b>0.9</b>                 | 0.0  | <b>1.0</b>                 | 0.1  | <b>0.9</b>    | 0.0   | 0.398  |
| Folate (ug DFE)   | <b>234.6</b>               | 15.0 | <b>246.6</b>               | 15.9 | <b>211.9</b>  | 24.9  | 0.615  |
| Vitamin B-12 (mg) | <b>2.2</b>                 | 0.1  | <b>2.2</b>                 | 0.2  | <b>1.8</b>    | 0.1   | 0.250  |
| Vitamin C (mg)    | <b>35.1</b> <sup>¥£</sup>  | 2.7  | <b>74.0</b>                | 5.1  | <b>82.3</b>   | 14.4  | <.0001 |
| Vitamin D (ug)    | <b>2.5</b>                 | 0.3  | <b>2.7</b>                 | 0.3  | <b>2.7</b>    | 0.2   | 0.148  |
| Calcium (mg)      | <b>370.3</b>               | 19.4 | <b>441.1</b>               | 23.5 | <b>481.3</b>  | 27.5  | 0.001  |
| Iron (mg)         | <b>7.1</b>                 | 0.2  | <b>7.4</b>                 | 0.3  | <b>6.4</b>    | 0.3   | 0.002  |
| Magnesium (mg)    | <b>184.4</b>               | 6.2  | <b>200.8</b>               | 6.8  | <b>177.3</b>  | 16.4  | 0.323  |
| Phosphorus (mg)   | <b>729.3</b>               | 26.8 | <b>730.2</b>               | 22.6 | <b>659.9</b>  | 32.3  | 0.168  |
| Potassium (mg)    | <b>1513.8</b>              | 77.3 | <b>1745.3</b>              | 40.7 | <b>1676.4</b> | 113.8 | 0.016  |
| Zinc (mg)         | <b>6.2</b> <sup>¥</sup>    | 0.2  | <b>6.1</b> <sup>¥</sup>    | 0.3  | <b>5.0</b>    | 0.1   | <.0001 |
| Sodium (mg)       | <b>1579.2</b> <sup>¥</sup> | 75.7 | <b>1511.9</b> <sup>¥</sup> | 65.3 | <b>1185.2</b> | 59.8  | <.0001 |

\* Intake of macro- and micronutrients across quintiles of total sugars intake (as % energy) were compared using a general linear model (PROC SURVEYREG) including the following covariates: Model 3, mis-reporting status (determined using previously published methods by Garriguet [47]), age, smoking, self-perceived health, blood pressure, diabetes, heart disease, cancer, osteoporosis, education, physical activity, income, BMI, immigrant status and weekend reference day. Note: Quintiles 2 and 4 are not presented for readability.

\*\* The p-value represents the global p-value for a significant difference across quintiles of intake of total sugars (%E)

<sup>¥</sup> significant difference compared to Q5 in post-hoc comparison with Bonferroni adjustment in Model 3 (p<0.05)

<sup>£</sup> significant difference compared to Q3 in post-hoc comparison with Bonferroni adjustment in Model 3 (p<0.05)

BMI, body mass index; DFE, dietary folate equivalents; y, years

**Supplemental Table S12.** Comparison of intakes from macro- and micronutrients by quintiles of total sugars intake (% energy) in Males Aged 71y+\*

| <b>Males 70y+ (n=1105)</b>           | <b>Q1</b>                |           | <b>Q3</b>               |           | <b>Q5</b>     |           | <b>p-value**</b> |
|--------------------------------------|--------------------------|-----------|-------------------------|-----------|---------------|-----------|------------------|
|                                      | <b>Mean</b>              | <b>SE</b> | <b>Mean</b>             | <b>SE</b> | <b>Mean</b>   | <b>SE</b> |                  |
| Energy (kcal)                        | <b>1770.6</b>            | 80.4      | <b>1783.6</b>           | 45.7      | <b>1727.2</b> | 50.2      | 0.971            |
| Carbohydrates (%)                    | <b>40.0<sup>¥£</sup></b> | 2.2       | <b>48.8<sup>¥</sup></b> | 1.2       | <b>59.3</b>   | 1.1       | <.0001           |
| Total Fibre (g/1000 kcal)            | <b>9.2</b>               | 0.5       | <b>10.2</b>             | 0.4       | <b>11.0</b>   | 0.6       | 0.158            |
| Total Sugars (%)                     | <b>8.0<sup>¥£</sup></b>  | 0.3       | <b>18.3<sup>¥</sup></b> | 0.1       | <b>32.8</b>   | 0.8       | <.0001           |
| Natural Sugars (%)                   | <b>4.9<sup>¥£</sup></b>  | 0.3       | <b>10.2<sup>¥</sup></b> | 0.4       | <b>17.7</b>   | 1.4       | <.0001           |
| Added Sugars (%)                     | <b>2.9<sup>¥£</sup></b>  | 0.3       | <b>8.0<sup>¥</sup></b>  | 0.5       | <b>14.9</b>   | 1.5       | <.0001           |
| Free Sugars (%)                      | <b>3.0<sup>¥£</sup></b>  | 0.3       | <b>9.1<sup>¥</sup></b>  | 0.5       | <b>17.9</b>   | 1.3       | <.0001           |
| Fat (%)                              | <b>34.2<sup>¥</sup></b>  | 1.1       | <b>32.1<sup>¥</sup></b> | 0.9       | <b>25.5</b>   | 1.2       | <.0001           |
| Saturated Fat (%)                    | <b>10.7</b>              | 0.4       | <b>10.5</b>             | 0.4       | <b>9.0</b>    | 0.5       | 0.074            |
| Monounsaturated Fat (%)              | <b>13.1<sup>¥</sup></b>  | 0.5       | <b>12.1<sup>¥</sup></b> | 0.5       | <b>9.1</b>    | 0.5       | <.0001           |
| Polyunsaturated Fat (%)              | <b>7.4<sup>¥</sup></b>   | 0.4       | <b>6.7<sup>¥</sup></b>  | 0.2       | <b>5.0</b>    | 0.3       | <.0001           |
| Linoleic acid (%)                    | <b>6.2<sup>¥</sup></b>   | 0.3       | <b>5.6<sup>¥</sup></b>  | 0.2       | <b>4.2</b>    | 0.2       | <.0001           |
| Alpha-linonelic Acid (%)             | <b>0.8</b>               | 0.0       | <b>0.8</b>              | 0.0       | <b>0.6</b>    | 0.1       | 0.258            |
| Protein (%)                          | <b>17.5<sup>¥</sup></b>  | 0.6       | <b>15.8<sup>¥</sup></b> | 0.5       | <b>13.6</b>   | 0.6       | <.0001           |
| Cholesterol (mg/1000 kcal)           | <b>171.0</b>             | 23.8      | <b>133.1</b>            | 10.5      | <b>116.4</b>  | 8.0       | 0.011            |
| Alcohol (%)                          | <b>8.3<sup>¥</sup></b>   | 2.0       | <b>3.3</b>              | 0.8       | <b>1.6</b>    | 0.7       | 0.002            |
| <b>micronutrients: per 1000 kcal</b> |                          |           |                         |           |               |           |                  |
| Vitamin A (ug RAE)                   | <b>321.9</b>             | 30.9      | <b>465.6</b>            | 66.6      | <b>388.6</b>  | 28.1      | 0.140            |
| Thiamin (mg)                         | <b>0.9</b>               | 0.1       | <b>0.9</b>              | 0.1       | <b>0.8</b>    | 0.0       | 0.213            |
| Riboflavin (mg)                      | <b>0.9</b>               | 0.0       | <b>1.1</b>              | 0.1       | <b>1.1</b>    | 0.0       | 0.008            |
| Niacin (mg)                          | <b>22.5<sup>¥</sup></b>  | 0.8       | <b>20.0<sup>¥</sup></b> | 1.2       | <b>16.6</b>   | 0.7       | <.0001           |

|                   |                           |      |               |      |               |      |        |
|-------------------|---------------------------|------|---------------|------|---------------|------|--------|
| Vitamin B-6 (mg)  | <b>0.9</b>                | 0.0  | <b>0.9</b>    | 0.0  | <b>0.9</b>    | 0.0  | 0.731  |
| Folate (ug DFE)   | <b>238.9</b>              | 17.8 | <b>246.1</b>  | 16.7 | <b>223.1</b>  | 9.4  | 0.679  |
| Vitamin B-12 (mg) | <b>2.1</b>                | 0.2  | <b>2.7</b>    | 0.6  | <b>1.8</b>    | 0.2  | 0.666  |
| Vitamin C (mg)    | <b>33.4<sup>¥</sup></b>   | 3.7  | <b>52.8</b>   | 7.7  | <b>90.5</b>   | 15.3 | <.0001 |
| Vitamin D (ug)    | <b>2.9</b>                | 0.4  | <b>3.3</b>    | 0.4  | <b>3.1</b>    | 0.3  | 0.460  |
| Calcium (mg)      | <b>304.1<sup>¥£</sup></b> | 13.4 | <b>422.3</b>  | 27.0 | <b>457.6</b>  | 32.4 | <.0001 |
| Iron (mg)         | <b>7.0</b>                | 0.4  | <b>7.3</b>    | 0.2  | <b>6.6</b>    | 0.3  | 0.256  |
| Magnesium (mg)    | <b>161.3</b>              | 5.3  | <b>171.5</b>  | 5.1  | <b>169.2</b>  | 6.6  | 0.346  |
| Phosphorus (mg)   | <b>657.7</b>              | 27.7 | <b>705.7</b>  | 28.9 | <b>657.6</b>  | 31.5 | 0.067  |
| Potassium (mg)    | <b>1362.8<sup>¥</sup></b> | 51.9 | <b>1564.9</b> | 45.7 | <b>1693.4</b> | 68.9 | <0.001 |
| Zinc (mg)         | <b>5.5</b>                | 0.4  | <b>5.9</b>    | 0.5  | <b>4.8</b>    | 0.3  | 0.031  |
| Sodium (mg)       | <b>1610.9<sup>¥</sup></b> | 71.8 | <b>1536.7</b> | 81.7 | <b>1262.9</b> | 68.7 | <.0001 |

\* Intake of macro- and micronutrients across quintiles of total sugars intake (as % energy) were compared using a general linear model (PROC SURVEYREG) including the following covariates: Model 3, mis-reporting status (determined using previously published methods by Garriguet [47]), age, smoking, self-perceived health, blood pressure, diabetes, heart disease, cancer, osteoporosis, education, physical activity, income, BMI, immigrant status and weekend reference day. Note: Quintiles 2 and 4 are not presented for readability.

\*\* The p-value represents the global p-value for a significant difference across quintiles of intake of total sugars (%E)

¥ significant difference compared to Q5 in post-hoc comparison with Bonferroni adjustment in Model 3 (p<0.05)

£ significant difference compared to Q3 in post-hoc comparison with Bonferroni adjustment in Model 3 (p<0.05)

BMI, body mass index; DFE, dietary folate equivalents; y, years

**Supplemental Table S13.** Comparison of intakes from macro- and micronutrients by quintiles of total sugars intake (% energy) in Females Aged 71y+\*

| <b>Females 70y+ (n=1340)</b>         | <b>Q1</b>                |           | <b>Q3</b>               |           | <b>Q5</b>     |           | <b>p-value**</b> |
|--------------------------------------|--------------------------|-----------|-------------------------|-----------|---------------|-----------|------------------|
|                                      | <b>Mean</b>              | <b>SE</b> | <b>Mean</b>             | <b>SE</b> | <b>Mean</b>   | <b>SE</b> |                  |
| Energy (kcal)                        | <b>1443.9</b>            | 77.3      | <b>1401.1</b>           | 33.4      | <b>1422.1</b> | 35.9      | 0.914            |
| Carbohydrates (%)                    | <b>41.8<sup>¥</sup></b>  | 1.3       | <b>48.2<sup>¥</sup></b> | 1.3       | <b>59.9</b>   | 1.7       | <.0001           |
| Total Fibre (g/1000 kcal)            | <b>9.8<sup>¥</sup></b>   | 0.6       | <b>10.6</b>             | 0.7       | <b>12.6</b>   | 0.8       | 0.027            |
| Total Sugars (%)                     | <b>8.4<sup>¥£</sup></b>  | 0.3       | <b>18.3<sup>¥</sup></b> | 0.2       | <b>32.6</b>   | 2.9       | <.0001           |
| Natural Sugars (%)                   | <b>5.4<sup>¥£</sup></b>  | 0.4       | <b>11.0<sup>¥</sup></b> | 0.4       | <b>18.7</b>   | 0.8       | <.0001           |
| Added Sugars (%)                     | <b>2.9<sup>¥£</sup></b>  | 0.3       | <b>7.2<sup>¥</sup></b>  | 0.4       | <b>13.8</b>   | 2.5       | <.0001           |
| Free Sugars (%)                      | <b>3.1<sup>¥£</sup></b>  | 0.3       | <b>8.8<sup>¥</sup></b>  | 0.5       | <b>16.9</b>   | 2.5       | <.0001           |
| Fat (%)                              | <b>36.4<sup>¥</sup></b>  | 1.0       | <b>32.6<sup>¥</sup></b> | 1.2       | <b>25.9</b>   | 1.1       | <.0001           |
| Saturated Fat (%)                    | <b>12.1<sup>¥</sup></b>  | 0.5       | <b>10.8</b>             | 0.6       | <b>9.0</b>    | 0.4       | 0.002            |
| Monounsaturated Fat (%)              | <b>13.6<sup>¥</sup></b>  | 0.7       | <b>11.7<sup>¥</sup></b> | 0.3       | <b>9.2</b>    | 0.5       | <.0001           |
| Polyunsaturated Fat (%)              | <b>7.4</b>               | 0.4       | <b>7.2<sup>¥</sup></b>  | 0.4       | <b>5.4</b>    | 0.3       | <0.001           |
| Linoleic acid (%)                    | <b>6.3</b>               | 0.4       | <b>6.1<sup>¥</sup></b>  | 0.4       | <b>4.5</b>    | 0.2       | <0.001           |
| Alpha-linolenic Acid (%)             | <b>0.8</b>               | 0.0       | <b>0.9<sup>¥</sup></b>  | 0.1       | <b>0.7</b>    | 0.1       | 0.013            |
| Protein (%)                          | <b>18.9</b>              | 0.8       | <b>16.4</b>             | 0.4       | <b>13.5</b>   | 0.7       | 0.015            |
| Cholesterol (mg/1000 kcal)           | <b>186.2<sup>¥</sup></b> | 16.3      | <b>144.2</b>            | 9.7       | <b>110.8</b>  | 12.6      | 0.040            |
| Alcohol (%)                          | <b>2.9</b>               | 0.9       | <b>2.8</b>              | 0.7       | <b>0.6</b>    | 0.3       | 0.039            |
| <b>micronutrients: per 1000 kcal</b> |                          |           |                         |           |               |           |                  |
| Vitamin A (ug RAE)                   | <b>344.5</b>             | 43.0      | <b>353.4</b>            | 36.3      | <b>450.1</b>  | 38.7      | 0.382            |
| Thiamin (mg)                         | <b>0.9</b>               | 0.0       | <b>0.9</b>              | 0.0       | <b>0.9</b>    | 0.1       | 0.655            |
| Riboflavin (mg)                      | <b>1.0</b>               | 0.0       | <b>1.0</b>              | 0.0       | <b>1.1</b>    | 0.1       | 0.323            |
| Niacin (mg)                          | <b>23.0</b>              | 0.8       | <b>20.5</b>             | 0.6       | <b>16.8</b>   | 0.8       | 0.014            |

|                   |                           |      |                         |      |               |      |        |
|-------------------|---------------------------|------|-------------------------|------|---------------|------|--------|
| Vitamin B-6 (mg)  | <b>0.9</b>                | 0.1  | <b>0.9</b>              | 0.0  | <b>0.9</b>    | 0.0  | 0.531  |
| Folate (ug DFE)   | <b>226.3</b>              | 21.4 | <b>238.5</b>            | 8.1  | <b>230.0</b>  | 9.6  | 0.460  |
| Vitamin B-12 (mg) | <b>2.3</b>                | 0.2  | <b>2.0</b>              | 0.2  | <b>1.8</b>    | 0.1  | 0.341  |
| Vitamin C (mg)    | <b>34.3<sup>¥£</sup></b>  | 6.1  | <b>57.4<sup>¥</sup></b> | 4.4  | <b>93.0</b>   | 8.1  | <.0001 |
| Vitamin D (ug)    | <b>2.5</b>                | 0.3  | <b>2.7</b>              | 0.3  | <b>3.2</b>    | 0.3  | 0.091  |
| Calcium (mg)      | <b>399.6</b>              | 18.8 | <b>428.4</b>            | 20.2 | <b>533.9</b>  | 45.8 | 0.004  |
| Iron (mg)         | <b>7.4</b>                | 0.4  | <b>7.1</b>              | 0.2  | <b>6.7</b>    | 0.3  | 0.617  |
| Magnesium (mg)    | <b>174.5</b>              | 5.6  | <b>175.2</b>            | 6.4  | <b>188.0</b>  | 10.8 | 0.682  |
| Phosphorus (mg)   | <b>737.8</b>              | 27.9 | <b>687.1</b>            | 19.1 | <b>718.4</b>  | 37.2 | 0.104  |
| Potassium (mg)    | <b>1507.5<sup>¥</sup></b> | 75.3 | <b>1569.7</b>           | 46.4 | <b>1799.3</b> | 60.9 | 0.006  |
| Zinc (mg)         | <b>6.5<sup>¥</sup></b>    | 0.4  | <b>5.4</b>              | 0.2  | <b>4.8</b>    | 0.3  | 0.021  |
| Sodium (mg)       | <b>1775.1<sup>¥</sup></b> | 84.5 | <b>1558.0</b>           | 47.8 | <b>1306.7</b> | 71.4 | 0.003  |

\* Intake of macro- and micronutrients across quintiles of total sugars intake (as % energy) were compared using a general linear model (PROC SURVEYREG) including the following covariates: Model 3, mis-reporting status (determined using previously published methods by Garriguet [47]), age, smoking, self-perceived health, blood pressure, diabetes, heart disease, cancer, osteoporosis, education, physical activity, income, BMI, immigrant status and weekend reference day. Note: Quintiles 2 and 4 are not presented for readability.

\*\* The p-value represents the global p-value for a significant difference across quintiles of intake of total sugars (%E)

<sup>¥</sup> significant difference compared to Q5 in post-hoc comparison with Bonferroni adjustment in Model 3 (p<0.05)

<sup>£</sup> significant difference compared to Q3 in post-hoc comparison with Bonferroni adjustment in Model 3 (p<0.05)

BMI, body mass index; DFE, dietary folate equivalents; y, years
